# Supplementary material for: Optimizing influenza vaccine policies for controlling 2009-like pandemics and regular outbreaks
Source: PeerJ. 2019 Jan 28;7:e6340. doi: 10.7717/peerj.6340 (PMC6354664; doi:10.7717/peerj.6340)
Supplement: File S1 [file peerj-07-6340-s001.xlsx]

## Sheet: 2013~16,e=0.59
	Real infection data												SIR			1										13.7252			Policy 1-1									Policy 1-2									Policy 1-3
	Week	2013-2014	2014-2015	2015-2016	average		5~4	6~5		weekly risk	Sum(week.risk)		Week	t	Beta(t)	Recover Rate	S(t)	New_Inf	I(t)	I->R	R(t)	S-> R	Sum_S(t)	Sum_I(t)	N	Error	SSE	SST	Week	New I						Error		Week	New I						Error		Week	New I
	23	48858	48148	65899	54301.7	0.0175244	0	0	0	54301.7	54301.7		23	0	0	0,	23499404	54301.7	54301.7	54301.7	54301.7	0	23499404	54301.7	23499404	0	0	2.79566e+07	23						54301.7	0		23						54301.7	0		23
	24	45680	49745	59467	51630.7	0.0166624	0	0	0	51630.7	105932		24	1	0.953012	0.953011775388624,	2.34451e+07	51630.5	51630.5	51630.5	105932	0	4.69445e+07	105932	23499404	0.12144	0.0147477	6.33362e+07	24	51801	51391	51981	51849	51750	51754.4	123.733		24	51784	51875	51761	51994	51726	51828	197.333		24	51709	52116
	25	46183	47049	57766	50332.7	0.0162435	0	0	0	50332.7	156265		25	2	0.979277	0.979276648024616,	2.33935e+07	50332.7	50332.7	50332.7	156265	0	7.0338e+07	156265	23499404	0.000143688	2.06463e-08	8.5681e+07	25	50422	50382	50705	50474	50609	50518.4	185.733		25	50246	50542	50818	50429	50409	50488.8	156.133		25	50430	50642
	26	44291	45218	52353	47287.3	0.0152607	0	0	0	47287.3	203552		26	3	0.945784	0.945783523002419,	2.33431e+07	47287.3	47287.3	47287.3	203552	0	9.36811e+07	203552	23499404	0.0792371	0.00627852	1.51333e+08	26	47283	47227	47489	47110	47549	47331.6	44.2667		26	47343	47605	47587	47487	47432	47490.8	203.467		26	47869	47398
	27	41622	44334	48876	44944	0.0145045	0	0	0	44944	248496		27	4	0.958748	0.958748486909395,	2.32959e+07	44943.9	44943.9	44943.9	248496	0	1.16977e+08	248496	23499404	0.12274	0.015065	2.14478e+08	27	45247	45310	44917	44655	45112	45048.2	104.2		27	44898	44917	45026	44889	45115	44969	25		27	45516	44719
	28	39500	43567	46642	43236.3	0.0139534	0	0	0	43236.3	291733		28	5	0.972288	0.972287577473297,	2.32509e+07	43236.3	43236.3	43236.3	291732	0	1.40228e+08	291732	23499404	0.0511461	0.00261593	2.67412e+08	28	43182	43443	42749	43094	43621	43217.8	18.5333		28	43116	43304	43506	43278	43275	43295.8	59.4667		28	43510	42347
	29	41863	42322	44946	43043.7	0.0138912	0	0	0	43043.7	334776		29	6	1.00806	1.0080551710652,	2.32077e+07	43043.5	43043.5	43043.5	334776	0	1.63436e+08	334776	23499404	0.18736	0.0351037	2.7375e+08	29	43302	43548	42280	43331	43632	43218.6	174.933		29	43066	42780	43262	43179	43544	43166.2	122.533		29	43315	42324
	30	39071	39564	42800	40478.3	0.0130633	0	0	0	40478.3	375255		30	7	0.953996	0.953996122546339,	2.31646e+07	40478.3	40478.3	40478.3	375254	0	1.866e+08	375254	23499404	0.014622	0.000213803	3.6522e+08	30	40872	40689	39837	40762	40871	40606.2	127.867		30	40698	40049	40642	40549	41160	40619.6	141.267		30	40759	39662
	31	39830	39244	38550	39208	0.0126533	0	0	0	39208	414463		31	8	0.984336	0.984335519887046,	2.31241e+07	39208	39208	39208	414462	0	2.09724e+08	414462	23499404	0.0125042	0.000156355	4.15388e+08	31	39449	39619	38411	39198	39519	39239.2	31.2		31	39265	38741	39322	39109	39699	39227.2	19.2		31	39526	38282
	32	39716	38955	42197	40289.3	0.0130023	0	0	0	40289.3	454752		32	9	1.04603	1.0460283166091,	2.30849e+07	40289.3	40289.3	40289.3	454751	0	2.32809e+08	454751	23499404	0.0139427	0.000194399	3.7248e+08	32	40422	40710	39811	40310	40649	40380.4	91.0667		32	40371	39537	40529	40262	40736	40287	2.33333		32	40621	39399
	33	39913	40511	41537	40653.7	0.0131199	0	0	0	40653.7	495406		33	10	1.02895	1.02895487234308,	2.30447e+07	40653.7	40653.7	40653.7	495405	0	2.55854e+08	495405	23499404	0.0135895	0.000184673	3.5855e+08	33	40772	41185	40162	40500	41060	40735.8	82.1333		33	40932	39906	41142	40814	41084	40775.6	121.933		33	40948	39482
	34	37800	41163	40919	39960.7	0.0128962	0	0	0	39960.7	535366		34	11	1.00412	1.00412286689019,	2.3004e+07	39960.7	39960.7	39960.7	535366	0	2.78858e+08	535366	23499404	0.0184537	0.000340539	3.85274e+08	34	39875	40643	39629	39750	40649	40109.2	148.533		34	40151	39053	40225	39950	40260	39927.8	32.8667		34	39705	39171
	35	39243	41303	36403	38983	0.0125807	0	0	0	38983	574349		35	12	0.998277	0.998276588695015,	2.2964e+07	38983	38983	38983	574349	0	3.01822e+08	574349	23499404	0.00286507	8.20865e-06	4.2461e+08	35	38871	39667	38738	38814	39793	39176.6	193.6		35	39147	38489	39086	38938	39078	38947.6	35.4		35	38808	38351
	36	43543	42578	47555	44558.7	0.0143801	0	0	0	44558.7	618908		36	13	1.17166	1.17166436918344,	2.29251e+07	44558.6	44558.6	44558.6	618907		3.24747e+08	618907	23499404	0.0199296	0.000397189	2.25913e+08	36	44477	45241	44083	44742	45481	44804.8	246.133		36	44545	44083	45088	44671	44535	44584.4	25.7333		36	44332	44294
	37	43059	40657	49287	44334.3	0.0143077	0	0	0	44334.3	663242		37	14	1.02188	1.0218790608568,	2.28805e+07	44334.3	44334.3	44334.3	663242		3.47628e+08	663242	23499404	0.00923758	8.5333e-05	2.32707e+08	37	44267	45208	43879	44541	45117	44602.4	268.067		37	44612	43644	44654	43976	44583	44293.8	40.5333		37	44383	44277
	38	41465	43732	49427	44874.7	0.0144821	0	0	0	44874.7	708117		38	15	1.04159	1.04158538980612,	2.28362e+07	44874.7	44874.7	44874.7	708116		3.70464e+08	708116	23499404	0.000910175	8.28419e-07	2.16514e+08	38	45125	45870	44394	45257	45688	45266.8	392.133		38	45234	44153	44934	44494	45245	44812	62.6667		38	45041	44450
	39	46004	43347	43392	44247.7	0.0142797	0	0	0	44247.7	752365		39	16	1.01666	1.01666336821509,	2.27913e+07	44247.7	44247.7	44247.7	752364		3.93255e+08	752364	23499404	0.00617254	3.81002e-05	2.35359e+08	39	44662	45261	43923	45069	45420	44867	619.333		39	44297	43716	44218	43706	44718	44131	116.667		39	44419	43943
	40	46086	46480	44539	45701.7	0.014749	0	0	0	45701.7	798066		40	17	1.06702	1.06702039616278,	2.2747e+07	45701.6	45701.6	45701.6	798066	136138	4.16002e+08	798066	23499404	0.0884116	0.00781661	1.9286e+08	40	46099	46791	45238	46255	47149	46306.4	604.733		40	45853	44738	45457	44944	45931	45384.6	317.067		40	45649	45401
	41	45110	46230	50200	47180	0.0152261	0	0	0	47180	845246		41	18	1.07509	1.0750932874501,	2.25652e+07	47180.2	47180.2	47180.2	845246	136153	4.38567e+08	845246	23499404	0.191576	0.0367014	1.53985e+08	41	47414	48173	46855	47785	48769	47799.2	619.2		41	47101	46178	46657	46708	47445	46817.8	362.2		41	47184	46526
	42	48477	48770	48011	48419.3	0.015626	0	0	0	48419.3	893666		42	19	1.0775	1.07750417555784,	2.23819e+07	48419.3	48419.3	48419.3	893665	136153	4.60949e+08	893665	23499404	0.0755134	0.00570228	1.24763e+08	42	48833	49836	48328	49447	50151	49319	899.667		42	48343	47297	47896	48196	48985	48143.4	275.933		42	47900	47548
	43	51469	45552	48531	48517.3	0.0156577	0	0	0	48517.3	942183		43	20	1.06081	1.06080545968792,	2.21973e+07	48517.4	48517.4	48517.4	942182	136154	4.83146e+08	942182	23499404	0.0169373	0.000286871	1.22583e+08	43	49045	49848	48453	50047	50409	49560.4	1043.07		43	48416	47529	48347	48391	49044	48345.4	171.933		43	47213	46938
	44	54191	44210	50140	49513.7	0.0159792	0	0	0	49513.7	991697		44	21	1.08947	1.08947091584999,	2.20126e+07	49514	49514	49514	991696	136154	5.05159e+08	991696	23499404	0.29537	0.0872432	1.01514e+08	44	50358	50791	50044	51390	51952	50907	1393.33		44	49449	48479	49332	48937	50276	49294.6	219.067		44	47760	47712
	45	51215	43694	50772	48560.3	0.0156715	0	0	0	48560.3	1040257		45	22	1.05589	1.05588950961458,	2.1827e+07	48560.4	48560.4	48560.4	1.04026e+06	136154	5.26986e+08	1.04026e+06	23499404	0.0912425	0.00832519	1.21633e+08	45	49918	50337	49285	50835	51416	50358.2	1797.87		45	48679	47905	48630	47986	49245	48489	71.3333		45	46676	46458
	46	49271	39509	51080	46620	0.0150454	0	0	0	46620	1086877		46	23	1.04241	1.04240948074805,	2.16422e+07	46619.3	46619.3	46619.3	1.08688e+06	136155	5.48628e+08	1.08688e+06	23499404	0.650663	0.423362	1.68197e+08	46	48672	48446	47900	49545	50233	48959.2	2339.2		46	46372	46125	46769	46391	47497	46630.8	10.8		46	44104	44612
	47	55299	45970	52766	51345	0.0165702	0	0	0	51345	1138222		47	24	1.20607	1.20606772972349,	2.14595e+07	51345.2	51345.2	51345.2	1.13822e+06	136156	5.70088e+08	1.13822e+06	23499404	0.215811	0.0465742	6.79647e+07	47	53852	54088	53407	55159	56435	54588.2	3243.2		47	51743	50532	52004	51290	52722	51658.2	313.2		47	48349	48617
	48	54279	47180	53021	51493.3	0.0166181	0	0	0	51493.3	1.18972e+06		48	25	1.1079	1.10789871790324,	2.1272e+07	51493.3	51493.3	51493.3	1.18971e+06	136156	5.9136e+08	1.18971e+06	23499404	0.0215416	0.000464041	6.5541e+07	48	54697	54837	54476	56121	57638	55553.8	4060.47		48	52497	51190	52510	51803	53125	52225	731.667		48	47792	48284
	49	61593	46647	54716	54318.7	0.0175299	0	0.000335465	0	54318.7	1244034		49	26	1.17569	1.17569476355413,	2.10843e+07	54318.5	54318.5	54318.5	1.24403e+06	136156	6.12444e+08	1.24403e+06	23499404	0.126473	0.0159954	2.77772e+07	49	58916	59090	58651	60348	61620	59725	5406.33		49	55986	54212	55728	54969	56535	55486	1167.33		49	49795	50632
	50	62114	50107	56698	56306.3	0.0181714	0	0.0395585	0.000335465	56306.3	1.30034e+06		50	27	1.16586	1.1658624371891,	2.08938e+07	56306.3	56306.3	56306.3	1.30034e+06	136157	6.33338e+08	1.30034e+06	23499404	0.0512179	0.00262328	1.07764e+07	50	62156	62082	62135	64136	65139	63129.6	6823.27		50	58901	56912	58522	57427	58859	58124.2	1817.87		50	50652	51467
	51	58059	44056	58715	53610	0.0173012	0	0	0.0395585	53610	1.35395e+06		51	28	1.08081	1.08080753289015,	2.07014e+07	53610.2	53610.2	53610.2	1.35395e+06	136157	6.54039e+08	1.35395e+06	23499404	0.225638	0.0509125	3.57493e+07	51	60263	61024	60737	62120	63630	61554.8	7944.8		51	56873	54784	56506	55336	56895	56078.8	2468.8		51	47860	48194
	52	64355	45986	73131	61157.3	0.0197369	0	0.135284	0.135284	61157.3	1.41511e+06		52	29	1.30695	1.30694828492551,	2.05116e+07	61157.4	61157.4	61157.4	1.41511e+06	136157	6.74551e+08	1.41511e+06	23499404	0.0610299	0.00372465	2.45945e+06	52	70392	71554	71567	72767	73873	72030.6	10873.3		52	65583	63243	65398	63696	65928	64769.6	3612.27		52	54374	54488
	1	77533	65685	54114	65777.3	0.0212279	0	0.226452	0.226452	65777.3	1.48088e+06		1	30	1.24418	1.24417752444103,	2.03143e+07	65777.3	65777.3	65777.3	1.48088e+06		6.94865e+08	1.48088e+06	23499404	0.0015071	2.27135e-06	3.82946e+07	1	77633	79484	79264	80381	81637	79679.8	13902.5		1	71749	68974	71029	69509	72178	70687.8	4910.47		1	58719	58436
	2	90771	64949	54854	70191.3	0.0226524	0	0.313554	0.313554	70191.3	1.55108e+06		2	31	1.23842	1.23841984493109,	2.02485e+07	70190.9	70190.9	70190.9	1.55108e+06		7.15114e+08	1.55108e+06	23499404	0.466915	0.21801	1.12408e+08	2	85016	86932	86366	87901	88744	86991.8	16800.5		2	76363	73533	75633	73728	76657	75182.8	4991.47		2	63373	62516
	3	94216	67726	66716	76219.3	0.0245977	0	0.432506	0.432506	76219.3	1.6273e+06		3	32	1.26461	1.2646115501849,	2.01783e+07	76219.5	76219.5	76219.5	1.62729e+06		7.35292e+08	1.62729e+06	23499404	0.165941	0.0275365	2.76566e+08	3	94474	96667	95747	97227	98590	96541	20321.7		3	82584	80201	82106	80366	82973	81646	5426.67		3	68914	67987
	4	108218	70411	80687	86438.7	0.0278958	0	0.634166	0.634166	86438.7	1.71373e+06		4	33	1.32573	1.32573277320067,	2.01021e+07	86438.4	86438.4	86438.4	1.71373e+06		7.55394e+08	1.71373e+06	23499404	0.237992	0.05664	7.20901e+08	4	109144	110514	110380	111831	113176	111009	24570.3		4	93584	90927	92925	91547	93889	92574.4	6135.73		4	78415	77424
	5	85377	72088	114916	90793.7	0.0293012	0	0.720104	0.720104	90793.7	1.80453e+06		5	34	1.23321	1.23321051823682,	2.00157e+07	90794	90794	90794	1.80453e+06		7.7541e+08	1.80453e+06	23499404	0.382374	0.14621	9.73727e+08	5	116193	117475	117520	118958	120012	118032	27237.9		5	98203	95607	97656	96469	98314	97249.8	6456.13		5	82590	81563
	6	87363	76496	63724	75861	0.0244821	0.0655166	0.425435	0.425435	75861	1.88039e+06		6	35	0.985412	0.985411798756795,	1.99249e+07	75860.2	75860.2	75860.2	1.88039e+06		7.95335e+08	1.88039e+06	23499404	0.8081	0.653025	2.64776e+08	6	96609	97682	97594	99285	99462	98126.4	22265.4		6	81715	79803	81102	80364	82117	81020.2	5159.2		6	69578	68550
	7	80565	47673	142119	90119	0.0290835	0.17074	0.706791	0.706791	90119	1.97051e+06		7	36	1.40645	1.40644602654105,	1.9849e+07	90119.6	90119.6	90119.6	1.97051e+06		8.15184e+08	1.97051e+06	23499404	0.578651	0.334837	9.32077e+08	7	114276	115295	114815	116763	117216	115673	25554		7	96342	94774	95513	94898	97022	95709.8	5590.8		7	82821	81676
	8	88481	67457	158995	104978	0.0338787	0.31444	1	1	104978	2.07549e+06		8	37	1.38539	1.38538767519955,	1.97589e+07	104978	104978	104978	2.07548e+06		8.34942e+08	2.07548e+06	23499404	0.143892	0.020705	2.06012e+09	8	132540	133254	132449	134824	134452	133504	28526.1		8	111611	110012	110498	110185	112687	110999	6020.93		8	96983	95932
	9	90700	65980	155819	104166	0.0336169	0.558055	0.98399	0.98399	104166	2179652		9	38	1.18642	1.18642034288595,	1.96539e+07	104166	104166	104166	2.17965e+06		8.54596e+08	2.17965e+06	23499404	0.0358064	0.0012821	1.98713e+09	9	130583	131069	130150	132716	131705	131245	27078.3		9	110655	109303	109284	109148	110846	109847	5680.87		9	96827	96360
	10	85683	66755	140144	97527.3	0.0314743	0.661872	0.852981	0.852981	97527.3	2.27718e+06		10	39	1.12542	1.12541988152658,	1.95498e+07	97527.3	97527.3	97527.3	2.27718e+06		8.74146e+08	2.27718e+06	23499404	0.0245325	0.000601842	1.43931e+09	10	120275	121536	120561	122912	121333	121323	23796.1		10	103064	101924	102051	102178	103237	102491	4963.47		10	91007	90764
	11	83910	71270	124785	93321.7	0.0301171	0.305898	0.76999	0.76999	93321.7	2370501		11	40	1.15596	1.15595739335741,	1.94522e+07	93321.2	93321.2	93321.2	2.3705e+06		8.93598e+08	2.3705e+06	23499404	0.422176	0.178233	1.13789e+09	11	113866	114413	114302	115644	114309	114507	21185.1		11	98642	97810	97459	97322	97522	97751	4429.33		11	87699	86945
	12	86312	74178	106481	88990.3	0.0287192	0.645789	0.684519	0.684519	88990.3	2.45949e+06		12	41	1.15753	1.15753233370719,	1.93589e+07	88989.3	88989.3	88989.3	2.45949e+06		9.12957e+08	2.45949e+06	23499404	1.07572	1.15718	8.64434e+08	12	107258	108364	107945	108846	107276	107938	18947.5		12	93594	93608	92960	92853	92263	93055.6	4065.27		12	84141	83319
	13	81366	73262	112179	88935.7	0.0287016	1	0.68344	0.68344	88935.7	2548427		13	42	1.21875	1.21875264968292,	1.92699e+07	88935.7	88935.7	88935.7	2.54842e+06		9.32227e+08	2.54842e+06	23499404	0.0306311	0.000938263	8.61223e+08	13	106119	106411	106659	106805	105076	106214	17278.3		13	93448	92814	92022	92898	91604	92557.2	3621.53		13	84337	84344
	14	72982	72626	85227	76945	0.0248319	0.980659	0.446826	0.446826	76945	2625372		14	43	1.05996	1.05996148612535,	1.9181e+07	76945	76945	76945	2.62537e+06		9.51408e+08	2.62537e+06	23499404	0.0475641	0.00226235	3.01228e+08	14	90284	90109	90854	90536	89031	90162.8	13217.8		14	80585	79989	79224	80182	78708	79737.6	2792.6		14	73721	73882
	15	78080	60877	74098	71018.3	0.0229193	0.822394	0.329873	0.329873	71018.3	2.69639e+06		15	44	1.13533	1.13532947443051,	1.9104e+07	71018.3	71018.3	71018.3	2.69639e+06		9.70512e+08	2.69639e+06	23499404	0.0291747	0.000851161	1.30628e+08	15	81664	81834	82298	81826	80815	81687.4	10669.1		15	74023	73347	72783	73727	72705	73317	2298.67		15	68655	69074
	16	70322	70490	67539	69450.3	0.0224132	0.722137	0.298932	0.298932	69450.3	2.76584e+06		16	45	1.2074	1.20740401514487,	1.9033e+07	69450.2	69450.2	69450.2	2.76584e+06		9.89545e+08	2.76584e+06	23499404	0.103696	0.0107529	9.72445e+07	16	78213	78817	79180	78146	76698	78210.8	8760.47		16	71964	72237	70708	72115	71007	71606.2	2155.87		16	67997	68610
	17	64181	67734	62682	64865.7	0.0209336	0.618883	0.208462	0.208462	64865.7	2.83071e+06		17	46	1.15739	1.15738585820287,	1.89636e+07	64865.7	64865.7	64865.7	2.8307e+06		1.00851e+09	2.8307e+06	23499404	0.0200044	0.000400177	2.78425e+07	17	72345	72345	72728	71571	70120	71821.8	6956.13		17	66936	67262	65876	67296	65707	66615.4	1749.73		17	64057	64104
	18	60463	61768	51376	57869	0.0186757	0.61758	0.0703949	0.0703949	57869	2.88858e+06		18	47	1.1093	1.10930391594533,	1.88987e+07	57868.3	57868.3	57868.3	2.88857e+06		1.02741e+09	2.88857e+06	23499404	0.708688	0.502238	2.95864e+06	18	63363	63700	63620	62622	61099	62880.8	5011.8		18	59428	60053	58466	59939	58036	59184.4	1315.4		18	57464	57684
	19	58586	60807	46420	55271	0.0178372	0.331739	0.0191281	0.0191281	55271	2.94385e+06		19	48	1.19127	1.19127406661825,	1.88408e+07	55270.8	55270.8	55270.8	2.94384e+06		1.04625e+09	2.94384e+06	23499404	0.221851	0.0492177	1.86457e+07	19	59786	59997	59727	58575	56987	59014.4	3743.4		19	56858	57367	55758	56657	54914	56310.8	1039.8		19	55274	55846
	20	54296	59794	43994	52694.7	0.0170058	0.190455	0	0	52694.7	2996541		20	49	1.19262	1.19262235555918,	1.87856e+07	52694.6	52694.6	52694.6	2.99654e+06		1.06503e+09	2.99654e+06	23499404	0.0979385	0.00959196	4.75328e+07	20	56151	56219	55588	54611	52920	55097.8	2403.13		20	53728	54570	52664	53604	52261	53365.4	670.733		20	52905	53883
	21	52763	59038	40442	50747.7	0.0163774	0.153076	0	0	50747.7	3.04729e+06		21	50	1.20802	1.20801694591141,	1.87329e+07	50744.2	50744.2	50744.2	3.04728e+06		1.08377e+09	3.04728e+06	23499404	3.4821	12.125	7.81704e+07	21	52773	53283	52644	51698	49863	52052.2	1304.53		21	51226	52605	51001	51382	49983	51239.4	491.733		21	51199	52122
	22	51963	65450	36616	51343	0.0165696	0.0437837	0	0	51343	3.09863e+06		22	51	1.27274	1.27274275472497,	1.86821e+07	51344.8	51344.8	51344.8	3.09863e+06		1.10245e+09	3.09863e+06	23499404	1.77813	3.16175	6.79977e+07	22	52281	52309	52382	51327	49522	51564.2	221.2		22	51745	53335	51168	51569	49952	51553.8	210.8		22	52044	52914
										54301.7			23	52	1.33396	1.333961660282,	1.86308e+07	54301.7	54301.7	54301.7	3.15293e+06		1.12108e+09	3.15293e+06	23499404	0.0761107	0.00579284	2.79566e+07		3411490	3440000	3412837	3450416	3454977	3.48825e+06				3153548	3111573	3133442	3121735	3149668	3.18829e+06				2914919	2901669
									SUM	3.09863e+06																	19.4282	1.79808e+10							Total error	389651								Total error	93079.2
									AVE	59589.1												1.77e+06					R2	1	R Model set									R Model set									R Model set
																													time risk	ILI_percent = Beta								time risk	ILI_percent = Beta								time risk	ILI_percent = Beta
																													Beta	1.77e+06								Beta	1.77e+06								Beta	1.77e+06
																													age risk	(1,1,1,1,1,1)								age risk	(1,1,1,1,1,1)								age risk	(1,1,1,1,1,1)
																													distance risk	(1,1,1,1,1,1,1,1,1,1,1,1,1,1,1,1,1,1,1,1,1,1)								distance risk	(1,1,1,1,1,1,1,1,1,1,1,1,1,1,1,1,1,1,1,1,1,1)								distance risk	(1,1,1,1,1,1,1,1,1,1,1,1,1,1,1,1,1,1,1,1,1,1)
																													beta	time risk* age risk*distance risk								beta	time risk* age risk*distance risk								beta	time risk* age risk*distance risk
																													Initial I	Propotional to each county								Initial I	Propotional to each county								Initial I	Propotional to each county
																													Random outbreaks	No								Random outbreaks	No								Random outbreaks	No
																													Doses	3 millions								Doses	3 millions								Doses	3 millions
																													arrival	Weeks 40~4， Child: 0.0208237659697461=3Millions/17Weeks/ Arrivals Adults:0.0329283680671516=3Millions/17Weeks/ Arrivals								arrival	Weeks 40~52， Child: 0.0272310785758219=3Millions/13weeks/arrivals adult: 0.0430601736262752=3Millions/13weeks/arrivals								arrival	Weeks 40~48， Child: 0.039333780165076=3millions/9weeks/arrivals Adult: 0.0621980285712864=3millions/9weeks/arrivals
																													R-beta output									R-beta output									R-beta output
																													Covered age groups	All								Covered age groups	All								Covered age groups	All
[truncated: 45 more columns]

## Sheet: 2009,e=0.69
	Real infection data (2009-10)				SIR			1										32.6486			Policy 1-1									Policy 1-2									Policy 1-3									Policy 1-4
	Week	weekly risk	Sum(week.risk)		Week	t	Beta(t)	Recover Rate	S(t)	New_Inf	I(t)	I->R	R(t)	S-> R	Sum_S(t)	Sum_I(t)	N	Error	SSE	SST	週	New I						Error		週	New I						Error		週	New I						Error		週	New I
	23	38459	38459		23	0	0	0,	23499404	38459	38459	38459	38459	0	23499404	38459	23499404	0	0	5.42481e+08	23						38459	0		23						38459	0		23						38459	0		23
	24	35033	73492		24	1	0.912408	0.912407952988203,	23460945	35032.9	35032.9	35032.9	73491.9	0	46960349	73491.9	23499404	0.131131	0.0171953	7.1381e+08	24	35387	35032	34855	35161	35318	35150.6	117.6		24	35077	35082	34883	35286	34589	34983.4	49.6		24	35188	35078	34956	34709	35107	35007.6	25.4		24	35245
	25	34871	108363		25	2	0.99853	0.998530446966964,	2.34259e+07	34872	34872	34872	108364	0	7.03863e+07	108364	23499404	0.985672	0.97155	7.22493e+08	25	35225	34694	34610	35015	35292	34967.2	96.2		25	34696	34962	34594	35441	34536	34845.8	25.2		25	34834	34968	34904	34164	35048	34783.6	87.4		25	35474
	26	34168	142531		26	3	0.984348	0.984347859337074,	2.3391e+07	34167.9	34167.9	34167.9	142532	0	9.37773e+07	142532	23499404	0.125333	0.0157083	7.60779e+08	26	34361	33775	34149	34274	34638	34239.4	71.4		26	33860	34610	33725	34292	34098	34117	51		26	34226	34481	34154	33170	34599	34126	42		26	34835
	27	35394	177925		27	4	1.04221	1.04220927765083,	2.33569e+07	35394.1	35394.1	35394.1	177926	0	1.17134e+08	177926	23499404	0.0889785	0.00791717	6.94651e+08	27	35701	35001	35379	35347	36244	35534.4	140.4		27	35181	36183	35082	35627	35314	35477.4	83.4		27	35781	35550	35342	34342	35384	35279.8	114.2		27	36328
	28	35166	213091		28	5	1.00113	1.00113096425647,	2.33215e+07	35165.8	35165.8	35165.8	213092	0	1.40456e+08	213092	23499404	0.171122	0.0292826	7.06721e+08	28	35459	34888	35099	35232	36246	35384.8	218.8		28	34795	36118	34836	35212	35369	35266	100		28	35588	35427	35138	33975	35099	35045.4	120.6		28	36112
	29	35528	248619		29	6	1.01954	1.01954381768775,	2.32863e+07	35528	35528	35528	248620	0	1.63742e+08	248620	23499404	0.011068	0.0001225	6.87605e+08	29	36047	35306	35669	35333	36632	35797.4	269.4		29	34968	36066	35186	35507	35493	35444	84		29	36038	36222	35261	34194	35351	35413.2	114.8		29	36327
	30	37313	285932		30	7	1.06147	1.06147068461962,	2.32508e+07	37312.9	37312.9	37312.9	285933	0	1.86993e+08	285933	23499404	0.0668525	0.00446926	5.97178e+08	30	37801	36545	37245	37361	38339	37458.2	145.2		30	36801	37674	36764	37542	37174	37191	122		30	38240	38100	37312	35811	37400	37372.6	59.6		30	37923
	31	40176	326108		31	8	1.09	1.09000266262647,	2.32135e+07	40176.3	40176.3	40176.3	326109	0	2.10206e+08	326109	23499404	0.323518	0.104664	4.65447e+08	31	40571	39426	39953	40388	41278	40323.2	147.2		31	39320	40572	39729	40261	39893	39955	221		31	40917	41389	40062	38717	40193	40255.6	79.6		31	40844
	32	37946	364054		32	9	0.957772	0.957771875471301,	2.31733e+07	37945.8	37945.8	37945.8	364055	0	2.3338e+08	364055	23499404	0.243352	0.0592203	5.66641e+08	32	38036	36894	37951	38475	39024	38076	130		32	36889	38358	37673	37952	38036	37781.6	164.4		32	38765	39219	37737	36439	38151	38062.2	116.2		32	38840
	33	42876	406930		33	10	1.14771	1.14770967665914,	2.31353e+07	42876	42876	42876	406931	0	2.56515e+08	406931	23499404	0.0209722	0.000439834	3.56236e+08	33	42949	41808	42836	43860	44135	43117.6	241.6		33	41962	43814	42627	42779	43111	42858.6	17.4		33	43486	44294	42342	41392	43488	43000.4	124.4		33	43990
	34	47586	454516		34	11	1.12938	1.12938108090225,	2.30925e+07	47584.8	47584.8	47584.8	454516	0	2.79607e+08	454516	23499404	1.163	1.35257	2.00625e+08	34	47619	46158	47403	48247	48797	47644.8	58.8		34	46998	48553	47372	47398	48161	47696.4	110.4		34	48216	49515	46846	45931	48199	47741.4	155.4		34	49052
	35	62262	516778		35	12	1.33425	1.33424755153448,	2.30449e+07	62262	62262	62262	516777	0	3.02652e+08	516777	23499404	0.0434776	0.0018903	261912	35	62390	60202	61967	62811	63841	62242.2	19.8		35	61470	63729	62057	61959	63157	62474.4	212.4		35	62669	64877	60943	60070	63041	62320	58		35	64281
	36	73837	590615		36	13	1.21257	1.21257224406016,	2.29826e+07	73836.9	73836.9	73836.9	590614		3.25635e+08	590614	23499404	0.143485	0.020588	1.4609e+08	36	73971	71740	73724	74420	75685	73908	71		36	72998	75798	73546	73389	74836	74113.4	276.4		36	74720	77451	72050	71857	74787	74173	336		36	76083
	37	79340	669955		37	14	1.10223	1.10223477255448,	2.29088e+07	79340.1	79340.1	79340.1	669954		3.48544e+08	669954	23499404	0.0745406	0.00555631	3.094e+08	37	79702	77416	78754	79961	80810	79328.6	11.4		37	78370	81459	79074	79197	80732	79766.4	426.4		37	80385	83274	77359	77297	80417	79746.4	406.4		37	81393
	38	72007	741962		38	15	0.934205	0.934204928285287,	2.28294e+07	72006.8	72006.8	72006.8	741961		3.71373e+08	741961	23499404	0.226441	0.0512757	1.05201e+08	38	72721	69845	70785	72377	73106	71766.8	240.2		38	71082	73804	71920	71799	73398	72400.6	393.6		38	72802	75246	70103	69987	73255	72278.6	271.6		38	73402
	39	68155	810117		39	16	0.977367	0.977366609336615,	2.27574e+07	68155	68155	68155	810116		3.94131e+08	810116	23499404	0.0407908	0.00166389	4.10211e+07	39	68673	65959	67155	69254	68961	68000.4	154.6		39	67445	69510	67825	67901	69946	68525.4	370.4		39	68945	70887	66354	66269	69471	68385.2	230.2		39	69072
	40	62123	872240		40	17	0.944036	0.944036306353213,	2.26893e+07	62122.7	62122.7	62122.7	872239	159299	4.1682e+08	872239	23499404	0.320901	0.102977	138960	40	62427	60013	61173	63055	62674	61868.4	254.6		40	61467	63466	61536	61839	63615	62384.6	261.6		40	62884	64670	60171	60721	63178	62324.8	201.8		40	63214
	41	71291	943531		41	18	1.20027	1.20027031964108,	2.24679e+07	71290.9	71290.9	71290.9	943530	159229	4.39288e+08	943530	23499404	0.0775416	0.00601271	9.10264e+07	41	72181	69185	70283	72832	72454	71387	96		41	70604	72625	70512	71205	72425	71474.2	183.2		41	72136	73685	69137	69793	72196	71389.4	98.4		41	71701
	42	77662	1021193		42	19	1.15119	1.15119245664461,	2.22373e+07	77662	77662	77662	1.02119e+06	159228	4.61525e+08	1.02119e+06	23499404	0.048743	0.00237588	2.53185e+08	42	78884	75426	77154	79692	78910	78013.2	351.2		42	77307	79211	77205	77544	78118	77877	215		42	78296	80173	74705	75369	77723	77253.2	408.8		42	76694
	43	89940	1111133		43	20	1.237	1.23699878024378,	2.20005e+07	89939.9	89939.9	89939.9	1.11113e+06	159229	4.83525e+08	1.11113e+06	23499404	0.0955149	0.0091231	7.94663e+08	43	91211	88106	89741	92728	92148	90786.8	846.8		43	89746	91782	89487	90325	90509	90369.8	429.8		43	90156	91765	85854	86784	89390	88789.8	1150.2		43	86032
	44	100003	1211136		44	21	1.20125	1.20124795083981,	2.17513e+07	100003	100003	100003	1.21113e+06	159225	5.05277e+08	1.21113e+06	23499404	0.0428781	0.00183853	1.46327e+09	44	102104	98580	100809	104013	102797	101661	1657.6		44	100490	101950	99661	100744	100893	100748	744.6		44	98842	101138	94605	95796	98169	97710	2293		44	92269
	45	101479	1312615		45	22	1.10954	1.10953809263599,	2.14921e+07	101479	101479	101479	1.31261e+06	159223	5.26769e+08	1.31261e+06	23499404	0.104436	0.010907	1.57838e+09	45	105229	100933	102953	106415	105358	104178	2698.6		45	102678	103242	101535	102648	102637	102548	1069		45	99833	102171	94429	96151	98425	98201.8	3277.2		45	89624
	46	104033	1416648		46	23	1.13468	1.13468095878339,	2.12314e+07	104033	104033	104033	1.41665e+06	159221	5.48e+08	1.41665e+06	23499404	0.0479686	0.00230099	1.78783e+09	46	109335	104763	106860	111272	109576	108361	4328.2		46	105408	106965	104050	105557	105797	105555	1522.4		46	101550	103168	95743	98081	99885	99685.4	4347.6		46	87705
	47	114780	1531428		47	24	1.23649	1.23649366497334,	2.09681e+07	114780	114780	114780	1.53143e+06	159219	5.68968e+08	1.53143e+06	23499404	0.181007	0.0327634	2.81216e+09	47	122337	117942	119622	124842	123193	121587	6807.2		47	117125	117943	115436	116632	117596	116946	2166.4		47	111175	112581	105259	106975	109543	109107	5673.4		47	92657
	48	133099	1664527		48	25	1.3168	1.3167970422913,	2.06941e+07	133099	133099	133099	1.66453e+06	159216	5.89662e+08	1.66453e+06	23499404	0.183609	0.0337124	5.09065e+09	48	143746	139427	141537	147685	145984	143676	10576.8		48	136801	137581	135145	135849	137611	136597	3498.4		48	127439	128890	120535	122992	125380	125047	8051.8		48	103827
	49	111482	1776009		49	26	0.964759	0.964758624967193,	2.04018e+07	111482	111482	111482	1.77601e+06	159213	6.10064e+08	1.77601e+06	23499404	0.11555	0.0133517	2.47325e+09	49	123011	119635	121169	126638	124801	123051	11568.8		49	115237	115676	114196	115337	116262	115342	3859.6		49	104807	106692	99492	102321	103583	103379	8103		49	84436
	50	91187	1867196		50	27	0.954812	0.954812171879377,	2.01311e+07	91187	91187	91187	1.86719e+06	159211	6.30195e+08	1.86719e+06	23499404	0.0239423	0.000573234	8.66524e+08	50	102986	101151	101952	106595	104793	103495	12308.4		50	95195	95860	95301	95798	96472	95725.2	4538.2		50	83770	85692	80095	81942	82962	82892.2	8294.8		50	67659
	51	69174	1936370		51	28	0.896674	0.89667350452623,	1.98807e+07	69173.8	69173.8	69173.8	1.93637e+06	159227	6.50076e+08	1.93637e+06	23499404	0.154292	0.023806	5.51124e+07	51	80367	78962	79791	82846	81408	80674.8	11500.8		51	73252	74009	73658	73565	74600	73816.8	4642.8		51	62547	63712	60435	61265	61982	61988.2	7185.8		51	50635
	52	66944	2003314		52	29	1.15722	1.15721973901937,	1.96523e+07	66944.4	66944.4	66944.4	2.00331e+06	159261	6.69728e+08	2.00331e+06	23499404	0.395845	0.156693	2.69753e+07	52	80122	79578	80013	82704	80924	80668.2	13724.2		52	72192	72655	72746	72891	73308	72758.4	5814.4		52	60149	61215	59070	59273	59858	59913	7031		52	49279
	1	62614	2065928		1	30	1.13143	1.13142533035804,	1.94261e+07	62613.6	62613.6	62613.6	2.06593e+06		6.89154e+08	2.06593e+06	23499404	0.395463	0.156391	746105	1	77740	76748	77899	79860	78259	78101.2	15487.2		1	68825	69682	69722	69637	70007	69574.6	6960.6		1	56245	56968	55491	55793	55923	56084	6530		1	46317
	2	62227	2128155		2	31	1.20611	1.20611188625507,	1.93635e+07	62227.6	62227.6	62227.6	2.12815e+06		7.08518e+08	2.12815e+06	23499404	0.566761	0.321218	227313	2	79777	78963	79896	81605	79930	80034.2	17807.2		2	68195	68659	68777	68818	69743	68838.4	6611.4		2	55948	56953	55593	56482	55667	56128.6	6098.4		2	46481
	3	63383	2191538		3	32	1.24011	1.24011028556435,	1.93013e+07	63382.8	63382.8	63382.8	2.19154e+06		7.27819e+08	2.19154e+06	23499404	0.15569	0.0242393	2.66595e+06	3	83332	83174	83583	85386	83522	83799.4	20416.4		3	69586	69580	69426	69903	70553	69809.6	6426.6		3	57563	58225	57265	57606	56784	57488.6	5894.4		3	48003
	4	57105	2248643		4	33	1.10052	1.10051927757394,	1.92379e+07	57104.4	57104.4	57104.4	2.24864e+06		7.47057e+08	2.24864e+06	23499404	0.614891	0.37809	2.15781e+07	4	76445	76390	76723	78612	76353	76904.6	19799.6		4	62633	62300	62640	62642	63497	62742.4	5637.4		4	52240	52797	52082	52387	51321	52165.4	4939.6		4	43774
	5	53529	2302172		5	34	1.14843	1.14843407839204,	1.91808e+07	53528.4	53528.4	53528.4	2.30217e+06		7.66238e+08	2.30217e+06	23499404	0.562805	0.31675	6.75886e+07	5	72347	73056	73218	74836	72308	73153	19624		5	58778	58286	58665	58553	59449	58746.2	5217.2		5	49286	49063	49492	49534	48035	49082	4447		5	41630
	6	55445	2357617		6	35	1.27259	1.27258934981254,	1.91272e+07	55445.7	55445.7	55445.7	2.35762e+06		7.85365e+08	2.35762e+06	23499404	0.740278	0.548012	3.97559e+07	6	74314	75360	75565	76617	74180	75207.2	19762.2		6	60975	59826	61028	60711	61633	60834.6	5389.6		6	51498	51200	52292	51732	50081	51360.6	4084.4		6	43806
	7	26321	2383938		7	36	0.584435	0.584434854288633,	1.90718e+07	26299	26299	26299	2.38391e+06		8.04437e+08	2.38391e+06	23499404	22.0216	484.952	1.25523e+09	7	35005	35670	35647	35983	34554	35371.8	9050.8		7	28968	28607	28984	28918	29410	28977.4	2656.4		7	24748	24265	25087	24662	23954	24543.2	1777.8		7	21186
	8	52474	2436412		8	37	2.46189	2.46188710044013,	1.90455e+07	52473.8	52473.8	52473.8	2.43639e+06		8.23482e+08	2.43639e+06	23499404	0.224607	0.0504485	8.60484e+07	8	69374	70762	70768	71043	68540	70097.4	17623.4		8	57594	56740	57952	57756	58388	57686	5212		8	49281	48457	50175	49748	47839	49100	3374		8	42475
	9	49022	2485434		9	38	1.15587	1.15586804996169,	1.8993e+07	49021.6	49021.6	49021.6	2.48541e+06		8.42475e+08	2.48541e+06	23499404	0.379769	0.144224	1.62008e+08	9	63993	65518	65462	65137	62931	64608.2	15586.2		9	54104	53014	54560	53709	54529	53983.2	4961.2		9	46413	45046	47628	46891	44668	46129.2	2892.8		9	40320
	10	54895	2540329		10	39	1.38909	1.38909259718585,	1.8944e+07	54895.1	54895.1	54895.1	2.5403e+06		8.61419e+08	2.5403e+06	23499404	0.0986655	0.00973488	4.69941e+07	10	70604	72947	72120	72264	69669	71520.8	16625.8		10	60603	58877	61221	59983	60578	60252.4	5357.4		10	52334	50213	53864	52587	50360	51871.6	3023.4		10	45906
	11	57655	2597984		11	40	1.30662	1.30661880248474,	1.88891e+07	57655	57655	57655	2.59796e+06		8.80308e+08	2.59796e+06	23499404	0.0130057	0.000169149	1.67709e+07	11	73159	75702	74873	74682	71900	74063.2	16408.2		11	63555	61393	64473	63039	63671	63226.2	5571.2		11	55074	52481	56869	55574	53135	54626.6	3028.4		11	49070
	12	62450	2660434		12	41	1.35166	1.35165804190003,	1.88314e+07	62449.7	62449.7	62449.7	2.66041e+06		8.9914e+08	2.66041e+06	23499404	0.279809	0.0782932	489683	12	77720	81059	80091	79427	76960	79051.4	16601.4		12	68311	66822	69685	68157	68884	68371.8	5921.8		12	59936	57267	62084	60517	58157	59592.2	2857.8		12	54164
	13	64817	2725251		13	42	1.29949	1.29949221437643,	1.8769e+07	64816.9	64816.9	64816.9	2.72523e+06		9.17909e+08	2.72523e+06	23499404	0.0870039	0.00756969	9.4051e+06	13	79189	83160	81611	80815	78817	80718.4	15901.4		13	70752	69050	72243	69981	71388	70682.8	5865.8		13	63337	59503	64969	63078	60797	62336.8	2480.2		13	57680
	14	57847	2783098		14	43	1.12127	1.12127141056898,	1.87042e+07	57847	57847	57847	2.78307e+06		9.36613e+08	2.78307e+06	23499404	0.00346588	1.20123e-05	1.52352e+07	14	69399	73064	71369	70448	69958	70847.6	13000.6		14	62941	61304	64478	62043	63411	62835.4	4988.4		14	56958	53116	58598	56903	54704	56055.8	1791.2		14	52454
	15	56724	2839822		15	44	1.23581	1.23580652822172,	1.86463e+07	56724.1	56724.1	56724.1	2.8398e+06		9.55259e+08	2.8398e+06	23499404	0.135948	0.0184819	2.5263e+07	15	66998	70955	68329	67956	67564	68360.4	11636.4		15	61200	59821	63191	60641	61716	61313.8	4589.8		15	55966	52041	57686	56173	53948	55162.8	1561.2		15	52597
	16	56005	2895827		16	45	1.24809	1.24809420755527,	1.85896e+07	56005.2	56005.2	56005.2	2.8958e+06		9.73849e+08	2.8958e+06	23499404	0.233208	0.054386	3.30076e+07	16	65352	68620	66546	65870	65581	66393.8	10388.8		16	60190	59378	62165	60107	60462	60460.4	4455.4		16	55540	51891	57565	55900	53586	54896.4	1108.6		16	52701
	17	58732	2954559		17	46	1.32967	1.32966568692057,	1.85336e+07	58731.9	58731.9	58731.9	2.95453e+06		9.92383e+08	2.95453e+06	23499404	0.101001	0.0102012	9.10969e+06	17	67488	70829	68493	67720	67049	68315.8	9583.8		17	62477	62187	64968	62805	63079	63103.2	4371.2		17	58231	54690	61081	59518	56233	57950.6	781.4		17	56097
	18	59064	3013623		18	47	1.27916	1.27915721062103,	1.84749e+07	59064	59064	59064	3.0136e+06		1.01086e+09	3.0136e+06	23499404	0.0484473	0.00234714	7.21581e+06	18	66739	70064	67563	66732	65985	67416.6	8352.6		18	62298	61897	64709	62622	62938	62892.8	3828.8		18	58647	55260	62036	60510	56890	58668.6	395.4		18	57174
	19	60393	3074016		19	48	1.30476	1.3047576186535,	1.84158e+07	60392.9	60392.9	60392.9	3.07399e+06		1.02927e+09	3.07399e+06	23499404	0.0541044	0.00292729	1.84206e+06	19	66898	70404	67402	66583	65959	67449.2	7056.2		19	63492	62431	65605	63699	63501	63745.6	3352.6		19	59744	56618	63546	62818	58497	60244.6	148.4		19	59611
	20	55349	3129365		20	49	1.17332	1.17331810771302,	1.83554e+07	55348.9	55348.9	55348.9	3.12934e+06		1.04763e+09	3.12934e+06	23499404	0.0620238	0.00384695	4.09757e+07	20	59948	63393	60689	60098	59304	60686.4	5337.4		20	58222	57114	59635	57999	57351	58064.2	2715.2		20	55484	51822	58662	58172	53569	55541.8	192.8		20	55346
	21	53333	3182698		21	50	1.23734	1.23734466589463,	1.83001e+07	53333	53333	53333	3.18267e+06		1.06593e+09	3.18267e+06	23499404	0.0340319	0.00115817	7.08497e+07	21	57509	59632	57504	56236	55865	57349.2	4016.2		21	56066	54643	57264	55295	54910	55635.6	2302.6		21	53960	49830	56927	57116	51691	53904.8	571.8		21	54163
	22	51605	3234303		22	51	1.24614	1.24614455843632,	1.82467e+07	51605.1	51605.1	51605.1	3.23428e+06		1.08418e+09	3.23428e+06	23499404	0.0707141	0.00500049	1.02926e+08	22	54387	56872	54560	53015	52986	54364	2759		22	53949	52168	55047	52870	52862	53379.2	1774.2		22	52515	48476	55190	55831	50355	52473.4	868.4		22	53123
		38459			23	52	0.962512	0.962511924357654,	1.81951e+07	38458.9	38458.9	38458.9	3.27274e+06		1.10237e+09	3.27274e+06	23499404	0.113331	0.0128439	5.42481e+08		3558270	3540732	3550502	3609758	3571540	3.60462e+06				3313128	3333036	3333799	3321364	3349646	3.36865e+06				3115332	3107712	3074575	3065319	3067458	3.12454e+06				2879011
	SUM	3234303																	490.139	2.74682e+10							Total error	371678								Total error	135820								Total error	117306
	AVE	61750.2												2.07e+06					R2	1	R Model set									R Model set									R Model set									R Model set
																					time risk	ILI_percent = Beta								time risk	ILI_percent = Beta								time risk	ILI_percent = Beta								time risk	ILI_percent = Beta
																					Beta	2.07e+06								Beta	2.07e+06								Beta	2.07e+06								Beta	2.07e+06
																					age risk	(1,1,1,1,1,1)								age risk	(1,1,1,1,1,1)								age risk	(1,1,1,1,1,1)								age risk	(1,1,1,1,1,1)
																					distance risk	(1,1,1,1,1,1,1,1,1,1,1,1,1,1,1,1,1,1,1,1,1,1)								distance risk	(1,1,1,1,1,1,1,1,1,1,1,1,1,1,1,1,1,1,1,1,1,1)								distance risk	(1,1,1,1,1,1,1,1,1,1,1,1,1,1,1,1,1,1,1,1,1,1)								distance risk	(1,1,1,1,1,1,1,1,1,1,1,1,1,1,1,1,1,1,1,1,1,1)
																					beta	time risk* age risk*distance risk								beta	time risk* age risk*distance risk								beta	time risk* age risk*distance risk								beta	time risk* age risk*distance risk
																					Initial I	Propotional to each county								Initial I	Propotional to each county								Initial I	Propotional to each county								Initial I	Propotional to each county
																					Random outbreaks	No								Random outbreaks	No								Random outbreaks	No								Random outbreaks	No
																					Doses	3 millions								Doses	3 millions								Doses	3 millions								Doses	3 millions
																					arrival	Weeks 40~4， Child: 0.0208237659697461=3Millions/17Weeks/ Arrivals Adults:0.0329283680671516=3Millions/17Weeks/ Arrivals								arrival	Weeks 40~52， Child: 0.0272310785758219=3Millions/13weeks/arrivals adult: 0.0430601736262752=3Millions/13weeks/arrivals								arrival	Weeks 40~48， Child: 0.039333780165076=3millions/9weeks/arrivals Adult: 0.0621980285712864=3millions/9weeks/arrivals								arrival	Weeks 40~44， Child: 0.0708008042971368=3millions/5Weeks/Arrivals Adult: 0.111956451428316=3millions/5Weeks/Arrivals
																					R-beta output									R-beta output									R-beta output									R-beta output
																					Covered age groups	All								Covered age groups	All								Covered age groups	All								Covered age groups	All
[truncated: 38 more columns]

## Sheet: 2013~16,e=0.5
	Real infection data												SIR			1										13.7252			Policy 1-1									Policy 1-2									Policy 1-3
	Week	2013-2014	2014-2015	2015-2016	average		5~4	6~5		weekly risk	Sum(week.risk)		Week	t	Beta(t)	Recover Rate	S(t)	New_Inf	I(t)	I->R	R(t)	S-> R	Sum_S(t)	Sum_I(t)	N	Error			週	New I						Error		週	New I						Error		週	New I
	23	48858	48148	65899	54301.7	0.0175244	0	0	0	54301.7	54301.7		23	0	0	0,	23499404	54301.7	54301.7	54301.7	54301.7	0	23499404	54301.7	23499404	0			23						54301.7	0		23						54301.7	0		23
	24	45680	49745	59467	51630.7	0.0166624	0	0	0	51630.7	105932		24	1	0.953012	0.953011775388624,	2.34451e+07	51630.5	51630.5	51630.5	105932	0	4.69445e+07	105932	23499404	0.12144			24	51438	51947	51644	51817	51702	51709.6	78.9333		24	51954	51769	51542	51352	51478	51619	11.6667		24	52005	51397
	25	46183	47049	57766	50332.7	0.0162435	0	0	0	50332.7	156265		25	2	0.979277	0.979276648024616,	2.33935e+07	50332.7	50332.7	50332.7	156265	0	7.0338e+07	156265	23499404	0.000143688			25	50051	50716	50400	50606	50646	50483.8	151.133		25	50798	50134	50117	49922	50334	50261	71.6667		25	50735	49870
	26	44291	45218	52353	47287.3	0.0152607	0	0	0	47287.3	203552		26	3	0.945784	0.945783523002419,	2.33431e+07	47287.3	47287.3	47287.3	203552	0	9.36811e+07	203552	23499404	0.0792371			26	46759	47672	47215	47754	47742	47428.4	141.067		26	47804	46914	46611	46906	47247	47096.4	190.933		26	47852	46659
	27	41622	44334	48876	44944	0.0145045	0	0	0	44944	248496		27	4	0.958748	0.958748486909395,	2.32959e+07	44943.9	44943.9	44943.9	248496	0	1.16977e+08	248496	23499404	0.12274			27	44592	45680	45203	45411	45372	45251.6	307.6		27	45399	44753	44233	44565	45107	44811.4	132.6		27	45590	44551
	28	39500	43567	46642	43236.3	0.0139534	0	0	0	43236.3	291733		28	5	0.972288	0.972287577473297,	2.32509e+07	43236.3	43236.3	43236.3	291732	0	1.40228e+08	291732	23499404	0.0511461			28	42794	43457	43340	43467	43613	43334.2	97.8667		28	43876	43263	42538	42909	43363	43189.8	46.5333		28	44378	42937
	29	41863	42322	44946	43043.7	0.0138912	0	0	0	43043.7	334776		29	6	1.00806	1.0080551710652,	2.32077e+07	43043.5	43043.5	43043.5	334776	0	1.63436e+08	334776	23499404	0.18736			29	42627	43412	43088	43365	43609	43220.2	176.533		29	44050	43051	42096	42630	43064	42978.2	65.4667		29	44158	42723
	30	39071	39564	42800	40478.3	0.0130633	0	0	0	40478.3	375255		30	7	0.953996	0.953996122546339,	2.31646e+07	40478.3	40478.3	40478.3	375254	0	1.866e+08	375254	23499404	0.014622			30	40310	40850	40418	40982	40759	40663.8	185.467		30	41677	40564	39615	39709	40222	40357.4	120.933		30	42025	39995
	31	39830	39244	38550	39208	0.0126533	0	0	0	39208	414463		31	8	0.984336	0.984335519887046,	2.31241e+07	39208	39208	39208	414462	0	2.09724e+08	414462	23499404	0.0125042			31	39356	39519	39278	39820	39680	39530.6	322.6		31	40297	39326	38576	38301	39058	39111.6	96.4		31	40637	38669
	32	39716	38955	42197	40289.3	0.0130023	0	0	0	40289.3	454752		32	9	1.04603	1.0460283166091,	2.30849e+07	40289.3	40289.3	40289.3	454751	0	2.32809e+08	454751	23499404	0.0139427			32	40426	40817	40189	41242	40978	40730.4	441.067		32	41241	40599	39646	39223	40495	40240.8	48.5333		32	41764	40257
	33	39913	40511	41537	40653.7	0.0131199	0	0	0	40653.7	495406		33	10	1.02895	1.02895487234308,	2.30447e+07	40653.7	40653.7	40653.7	495405	0	2.55854e+08	495405	23499404	0.0135895			33	40931	40824	40547	41697	41465	41092.8	439.133		33	41922	41130	39789	39698	41189	40745.6	91.9333		33	42106	40797
	34	37800	41163	40919	39960.7	0.0128962	0	0	0	39960.7	535366		34	11	1.00412	1.00412286689019,	2.3004e+07	39960.7	39960.7	39960.7	535366	0	2.78858e+08	535366	23499404	0.0184537			34	40244	40384	40099	40803	41014	40508.8	548.133		34	41299	40345	39221	38790	40522	40035.4	74.7333		34	41221	40284
	35	39243	41303	36403	38983	0.0125807	0	0	0	38983	574349		35	12	0.998277	0.998276588695015,	2.2964e+07	38983	38983	38983	574349	0	3.01822e+08	574349	23499404	0.00286507			35	39490	39440	38822	39583	39980	39463	480		35	40549	39312	38309	37978	39527	39135	152		35	40085	39484
	36	43543	42578	47555	44558.7	0.0143801	0	0	0	44558.7	618908		36	13	1.17166	1.17166436918344,	2.29251e+07	44558.6	44558.6	44558.6	618907		3.24747e+08	618907	23499404	0.0199296			36	45116	45168	44582	45356	45672	45178.8	620.133		36	46370	44938	44032	43384	44899	44724.6	165.933		36	46045	45239
	37	43059	40657	49287	44334.3	0.0143077	0	0	0	44334.3	663242		37	14	1.02188	1.0218790608568,	2.28805e+07	44334.3	44334.3	44334.3	663242		3.47628e+08	663242	23499404	0.00923758			37	44720	45265	44490	45076	45186	44947.4	613.067		37	46037	44968	43655	43641	44407	44541.6	207.267		37	45825	45184
	38	41465	43732	49427	44874.7	0.0144821	0	0	0	44874.7	708117		38	15	1.04159	1.04158538980612,	2.28362e+07	44874.7	44874.7	44874.7	708116		3.70464e+08	708116	23499404	0.000910175			38	45103	45519	44930	45535	45515	45320.4	445.733		38	46316	45199	44177	43844	45226	44952.4	77.7333		38	46424	46131
	39	46004	43347	43392	44247.7	0.0142797	0	0	0	44247.7	752365		39	16	1.01666	1.01666336821509,	2.27913e+07	44247.7	44247.7	44247.7	752364		3.93255e+08	752364	23499404	0.00617254			39	44847	44849	44358	45033	44860	44789.4	541.733		39	45298	44555	43548	43118	44679	44239.6	8.06667		39	45713	45048
	40	46086	46480	44539	45701.7	0.014749	0	0	0	45701.7	798066		40	17	1.06702	1.06702039616278,	2.2747e+07	45701.6	45701.6	45701.6	798066	136138	4.16002e+08	798066	23499404	0.0884116			40	46647	46220	45745	46636	46631	46375.8	674.133		40	46779	46067	44940	44431	46525	45748.4	46.7333		40	46971	46067
	41	45110	46230	50200	47180	0.0152261	0	0	0	47180	845246		41	18	1.07509	1.0750932874501,	2.25652e+07	47180.2	47180.2	47180.2	845246	136153	4.38567e+08	845246	23499404	0.191576			41	48109	47842	47511	48401	47923	47957.2	777.2		41	48563	47688	46112	45915	48335	47322.6	142.6		41	48665	47774
	42	48477	48770	48011	48419.3	0.015626	0	0	0	48419.3	893666		42	19	1.0775	1.07750417555784,	2.23819e+07	48419.3	48419.3	48419.3	893665	136153	4.60949e+08	893665	23499404	0.0755134			42	49082	49421	48615	49890	48970	49195.6	776.267		42	50172	48997	47277	47550	49793	48757.8	338.467		42	50034	48752
	43	51469	45552	48531	48517.3	0.0156577	0	0	0	48517.3	942183		43	20	1.06081	1.06080545968792,	2.21973e+07	48517.4	48517.4	48517.4	942182	136154	4.83146e+08	942182	23499404	0.0169373			43	49544	49773	48958	50573	49393	49648.2	1130.87		43	50504	49871	47406	47914	50223	49183.6	666.267		43	49603	48312
	44	54191	44210	50140	49513.7	0.0159792	0	0	0	49513.7	991697		44	21	1.08947	1.08947091584999,	2.20126e+07	49514	49514	49514	991696	136154	5.05159e+08	991696	23499404	0.29537			44	51005	51662	50185	52065	51478	51279	1765.33		44	51443	50893	48455	49469	51280	50308	794.333		44	50559	49082
	45	51215	43694	50772	48560.3	0.0156715	0	0	0	48560.3	1040257		45	22	1.05589	1.05588950961458,	2.1827e+07	48560.4	48560.4	48560.4	1.04026e+06	136154	5.26986e+08	1.04026e+06	23499404	0.0912425			45	50629	51025	49625	51891	51459	50925.8	2365.47		45	50619	50157	47680	48943	50261	49532	971.667		45	48866	48005
	46	49271	39509	51080	46620	0.0150454	0	0	0	46620	1086877		46	23	1.04241	1.04240948074805,	2.16422e+07	46619.3	46619.3	46619.3	1.08688e+06	136155	5.48628e+08	1.08688e+06	23499404	0.650663			46	49243	49812	48442	50632	50398	49705.4	3085.4		46	49133	48368	46643	47349	48647	48028	1408		46	47014	46017
	47	55299	45970	52766	51345	0.0165702	0	0	0	51345	1138222		47	24	1.20607	1.20606772972349,	2.14595e+07	51345.2	51345.2	51345.2	1.13822e+06	136156	5.70088e+08	1.13822e+06	23499404	0.215811			47	55058	55424	54170	56746	56614	55602.4	4257.4		47	54705	53447	52154	52836	53628	53354	2009		47	51743	50665
	48	54279	47180	53021	51493.3	0.0166181	0	0	0	51493.3	1.18972e+06		48	25	1.1079	1.10789871790324,	2.1272e+07	51493.3	51493.3	51493.3	1.18971e+06	136156	5.9136e+08	1.18971e+06	23499404	0.0215416			48	56348	56659	55518	57949	57970	56888.8	5395.47		48	55359	54261	53164	53350	54531	54133	2639.67		48	51339	50649
	49	61593	46647	54716	54318.7	0.0175299	0	0.000335465	0	54318.7	1244034		49	26	1.17569	1.17569476355413,	2.10843e+07	54318.5	54318.5	54318.5	1.24403e+06	136156	6.12444e+08	1.24403e+06	23499404	0.126473			49	60688	61369	59890	62493	62431	61374.2	7055.53		49	59020	58254	56980	57047	57957	57851.6	3532.93		49	53664	53384
	50	62114	50107	56698	56306.3	0.0181714	0	0.0395585	0.000335465	56306.3	1.30034e+06		50	27	1.16586	1.1658624371891,	2.08938e+07	56306.3	56306.3	56306.3	1.30034e+06	136157	6.33338e+08	1.30034e+06	23499404	0.0512179			50	65154	65510	63839	66620	66245	65473.6	9167.27		50	61977	61523	59759	60247	61116	60924.4	4618.07		50	55472	54887
	51	58059	44056	58715	53610	0.0173012	0	0	0.0395585	53610	1.35395e+06		51	28	1.08081	1.08080753289015,	2.07014e+07	53610.2	53610.2	53610.2	1.35395e+06	136157	6.54039e+08	1.35395e+06	23499404	0.225638			51	63838	64391	62615	65101	64858	64160.6	10550.6		51	60269	59424	58150	58372	58712	58985.4	5375.4		51	53249	51882
	52	64355	45986	73131	61157.3	0.0197369	0	0.135284	0.135284	61157.3	1.41511e+06		52	29	1.30695	1.30694828492551,	2.05116e+07	61157.4	61157.4	61157.4	1.41511e+06	136157	6.74551e+08	1.41511e+06	23499404	0.0610299			52	75405	76176	74032	76159	76452	75644.8	14487.5		52	69775	69120	67813	68125	68133	68593.2	7435.87		52	61098	59743
	1	77533	65685	54114	65777.3	0.0212279	0	0.226452	0.226452	65777.3	1.48088e+06		1	30	1.24418	1.24417752444103,	2.03143e+07	65777.3	65777.3	65777.3	1.48088e+06		6.94865e+08	1.48088e+06	23499404	0.0015071			1	83897	84883	82297	84910	85007	84198.8	18421.5		1	76131	75751	75079	74920	74928	75361.8	9584.47		1	66422	65376
	2	90771	64949	54854	70191.3	0.0226524	0	0.313554	0.313554	70191.3	1.55108e+06		2	31	1.23842	1.23841984493109,	2.02485e+07	70190.9	70190.9	70190.9	1.55108e+06		7.15114e+08	1.55108e+06	23499404	0.466915			2	92361	93185	90458	93356	93353	92542.6	22351.3		2	81870	81794	80971	81421	80852	81381.6	11190.3		2	71669	70731
	3	94216	67726	66716	76219.3	0.0245977	0	0.432506	0.432506	76219.3	1.6273e+06		3	32	1.26461	1.2646115501849,	2.01783e+07	76219.5	76219.5	76219.5	1.62729e+06		7.35292e+08	1.62729e+06	23499404	0.165941			3	102936	104507	100695	103625	103809	103114	26895.1		3	89499	89637	89039	89658	89006	89367.8	13148.5		3	79162	78013
	4	108218	70411	80687	86438.7	0.0278958	0	0.634166	0.634166	86438.7	1.71373e+06		4	33	1.32573	1.32573277320067,	2.01021e+07	86438.4	86438.4	86438.4	1.71373e+06		7.55394e+08	1.71373e+06	23499404	0.237992			4	119152	121064	117316	120039	120252	119565	33125.9		4	102459	102461	102314	103337	102208	102556	16117.1		4	91396	89466
	5	85377	72088	114916	90793.7	0.0293012	0	0.720104	0.720104	90793.7	1.80453e+06		5	34	1.23321	1.23321051823682,	2.00157e+07	90794	90794	90794	1.80453e+06		7.7541e+08	1.80453e+06	23499404	0.382374			5	127931	129345	124877	128361	128462	127795	37001.5		5	108879	108590	109489	109742	108646	109069	18275.5		5	97532	95250
	6	87363	76496	63724	75861	0.0244821	0.0655166	0.425435	0.425435	75861	1.88039e+06		6	35	0.985412	0.985411798756795,	1.99249e+07	75860.2	75860.2	75860.2	1.88039e+06		7.95335e+08	1.88039e+06	23499404	0.8081			6	107145	108914	104858	107618	107862	107279	31418.4		6	91533	91895	91680	91960	91415	91696.6	15835.6		6	82551	80743
	7	80565	47673	142119	90119	0.0290835	0.17074	0.706791	0.706791	90119	1.97051e+06		7	36	1.40645	1.40644602654105,	1.9849e+07	90119.6	90119.6	90119.6	1.97051e+06		8.15184e+08	1.97051e+06	23499404	0.578651			7	127335	129471	125041	127677	128124	127530	37410.6		7	109102	110246	109947	110021	109621	109787	19668.4		7	99185	96550
	8	88481	67457	158995	104978	0.0338787	0.31444	1	1	104978	2.07549e+06		8	37	1.38539	1.38538767519955,	1.97589e+07	104978	104978	104978	2.07548e+06		8.34942e+08	2.07548e+06	23499404	0.143892			8	147904	150767	145916	148308	149033	148386	43407.9		8	127528	130277	128547	129264	128721	128867	23889.7		8	116829	113887
	9	90700	65980	155819	104166	0.0336169	0.558055	0.98399	0.98399	104166	2179652		9	38	1.18642	1.18642034288595,	1.96539e+07	104166	104166	104166	2.17965e+06		8.54596e+08	2.17965e+06	23499404	0.0358064			9	146891	148991	145286	146614	147922	147141	42974.5		9	127036	129935	128506	128954	128419	128570	24403.7		9	116716	114780
	10	85683	66755	140144	97527.3	0.0314743	0.661872	0.852981	0.852981	97527.3	2.27718e+06		10	39	1.12542	1.12541988152658,	1.95498e+07	97527.3	97527.3	97527.3	2.27718e+06		8.74146e+08	2.27718e+06	23499404	0.0245325			10	136658	138844	135438	135859	138083	136976	39449.1		10	118893	122208	120750	121697	121326	120975	23447.5		10	110414	109388
	11	83910	71270	124785	93321.7	0.0301171	0.305898	0.76999	0.76999	93321.7	2370501		11	40	1.15596	1.15595739335741,	1.94522e+07	93321.2	93321.2	93321.2	2.3705e+06		8.93598e+08	2.3705e+06	23499404	0.422176			11	129530	131659	129748	128998	131880	130363	37041.3		11	113948	117347	116138	116868	116211	116102	22780.7		11	106000	105603
	12	86312	74178	106481	88990.3	0.0287192	0.645789	0.684519	0.684519	88990.3	2.45949e+06		12	41	1.15753	1.15753233370719,	1.93589e+07	88989.3	88989.3	88989.3	2.45949e+06		9.12957e+08	2.45949e+06	23499404	1.07572			12	122020	124845	122645	122273	123524	123061	34071.1		12	108711	112420	111274	112416	110916	111147	22157.1		12	101837	101568
	13	81366	73262	112179	88935.7	0.0287016	1	0.68344	0.68344	88935.7	2548427		13	42	1.21875	1.21875264968292,	1.92699e+07	88935.7	88935.7	88935.7	2.54842e+06		9.32227e+08	2.54842e+06	23499404	0.0306311			13	120811	123074	122005	120485	122006	121676	32740.5		13	108884	112047	111680	113099	110972	111336	22400.7		13	103007	102506
	14	72982	72626	85227	76945	0.0248319	0.980659	0.446826	0.446826	76945	2625372		14	43	1.05996	1.05996148612535,	1.9181e+07	76945	76945	76945	2.62537e+06		9.51408e+08	2.62537e+06	23499404	0.0475641			14	102868	104743	104439	103169	104247	103893	26948.2		14	94292	97022	96955	97890	96584	96548.6	19603.6		14	89715	89953
	15	78080	60877	74098	71018.3	0.0229193	0.822394	0.329873	0.329873	71018.3	2.69639e+06		15	44	1.13533	1.13532947443051,	1.9104e+07	71018.3	71018.3	71018.3	2.69639e+06		9.70512e+08	2.69639e+06	23499404	0.0291747			15	93752	94864	95325	93915	94663	94503.8	23485.5		15	86679	89393	89625	90162	88801	88932	17913.7		15	83704	83706
	16	70322	70490	67539	69450.3	0.0224132	0.722137	0.298932	0.298932	69450.3	2.76584e+06		16	45	1.2074	1.20740401514487,	1.9033e+07	69450.2	69450.2	69450.2	2.76584e+06		9.89545e+08	2.76584e+06	23499404	0.103696			16	90518	91222	92061	90312	90978	91018.2	21567.9		16	84689	86998	87387	87789	87086	86789.8	17339.5		16	82105	82752
	17	64181	67734	62682	64865.7	0.0209336	0.618883	0.208462	0.208462	64865.7	2.83071e+06		17	46	1.15739	1.15738585820287,	1.89636e+07	64865.7	64865.7	64865.7	2.8307e+06		1.00851e+09	2.8307e+06	23499404	0.0200044			17	83237	84103	84816	82749	83004	83581.8	18716.1		17	78750	80914	81563	82007	81272	80901.2	16035.5		17	77183	78373
	18	60463	61768	51376	57869	0.0186757	0.61758	0.0703949	0.0703949	57869	2.88858e+06		18	47	1.1093	1.10930391594533,	1.88987e+07	57868.3	57868.3	57868.3	2.88857e+06		1.02741e+09	2.88857e+06	23499404	0.708688			18	73817	73564	74518	72767	72654	73464	15595		18	70133	71859	72675	72691	72184	71908.4	14039.4		18	69124	70488
	19	58586	60807	46420	55271	0.0178372	0.331739	0.0191281	0.0191281	55271	2.94385e+06		19	48	1.19127	1.19127406661825,	1.88408e+07	55270.8	55270.8	55270.8	2.94384e+06		1.04625e+09	2.94384e+06	23499404	0.221851			19	69386	68942	70366	68331	67730	68951	13680		19	66949	68023	69239	69447	68788	68489.2	13218.2		19	65900	67922
	20	54296	59794	43994	52694.7	0.0170058	0.190455	0	0	52694.7	2996541		20	49	1.19262	1.19262235555918,	1.87856e+07	52694.6	52694.6	52694.6	2.99654e+06		1.06503e+09	2.99654e+06	23499404	0.0979385			20	65199	64072	66574	64313	63201	64671.8	11977.1		20	63252	64151	65840	65883	65400	64905.2	12210.5		20	63482	65119
	21	52763	59038	40442	50747.7	0.0163774	0.153076	0	0	50747.7	3.04729e+06		21	50	1.20802	1.20801694591141,	1.87329e+07	50744.2	50744.2	50744.2	3.04728e+06		1.08377e+09	3.04728e+06	23499404	3.4821			21	62164	60816	63219	61118	60184	61500.2	10752.5		21	60783	61156	63328	63030	62549	62169.2	11421.5		21	61341	63033
	22	51963	65450	36616	51343	0.0165696	0.0437837	0	0	51343	3.09863e+06		22	51	1.27274	1.27274275472497,	1.86821e+07	51344.8	51344.8	51344.8	3.09863e+06		1.10245e+09	3.09863e+06	23499404	1.77813			22	61877	60393	62904	60337	59847	61071.6	9728.6		22	61284	61224	63699	63527	62998	62546.4	11203.4		22	62654	64059
										54301.7			23	52	1.33396	1.333961660282,	1.86308e+07	54301.7	54301.7	54301.7	3.15293e+06		1.12108e+09	3.15293e+06	23499404	0.0761107				3686943	3723071	3668550	3707837	3714440	3.75447e+06				3454489	3464238	3429963	3443301	3458861	3.50447e+06				3282768	3243710
										3.09863e+06																									Total error	655838								Total error	407426
																						1.77e+06							R Model set									R Model set									R Model set
																													time risk	ILI_percent = Beta								time risk	ILI_percent = Beta								time risk	ILI_percent = Beta
																													Beta	1.77e+06								Beta	1.77e+06								Beta	1.77e+06
																													age risk	(1,1,1,1,1,1)								age risk	(1,1,1,1,1,1)								age risk	(1,1,1,1,1,1)
																													distance risk	(1,1,1,1,1,1,1,1,1,1,1,1,1,1,1,1,1,1,1,1,1,1)								distance risk	(1,1,1,1,1,1,1,1,1,1,1,1,1,1,1,1,1,1,1,1,1,1)								distance risk	(1,1,1,1,1,1,1,1,1,1,1,1,1,1,1,1,1,1,1,1,1,1)
																													beta	time risk* age risk*distance risk								beta	time risk* age risk*distance risk								beta	time risk* age risk*distance risk
																													Initial I	Propotional to each county								Initial I	Propotional to each county								Initial I	Propotional to each county
																													Random outbreaks	No								Random outbreaks	No								Random outbreaks	No
																													Doses	3 millions								Doses	3 millions								Doses	3 millions
																													arrival	Weeks 40~4， Child: 0.0208237659697461=3Millions/17Weeks/ Arrivals Adults:0.0329283680671516=3Millions/17Weeks/ Arrivals								arrival	Weeks 40~52， Child: 0.0272310785758219=3Millions/13weeks/arrivals adult: 0.0430601736262752=3Millions/13weeks/arrivals								arrival	Weeks 40~48， Child: 0.039333780165076=3millions/9weeks/arrivals Adult: 0.0621980285712864=3millions/9weeks/arrivals
																													R-beta output									R-beta output									R-beta output
																													Covered age groups	All								Covered age groups	All								Covered age groups	All
[truncated: 45 more columns]

## Sheet: Vaccination
													3Millions				6Millions
													Policy 1	Policy 2	Policy 3	Policy 4	Policy 1	Policy 2	Policy 3	Policy 4		0-3	4~12	13~18	19~49	50~64	65+
												31										137468	297112	267805	1914337	913442	440836
												32										120664	205876	164656	1200873	605421	406339
												33										85741	190469	167922	1038311	426074	208471
												34										109329	237616	212319	1334924	567531	288603
												35										63370	138697	126412	879990	425827	250956
												36										90444	201629	189080	1312318	626466	358170
												37										14001	34146	32888	210224	100452	66104
												38										23784	54777	41984	259499	100863	62693
2009-09-01	2013-09-01	2014-09-01	2015-09-01	2016-09-01		36	36	36	36	36		39										21984	44003	39685	257423	117817	81221
2009-10-01	2013-10-01	2014-10-01	2015-10-01	2016-10-01		40	40	40	40	40		40										47289	101614	96075	599451	266461	178033
2009-10-02	2013-10-02	2014-10-02	2015-10-02	2016-10-02		40	40	40	40	41		41										13814	35390	36410	227479	116419	78340
2009-10-03	2013-10-03	2014-10-03	2015-10-03	2016-10-03		40	40	40	40	41		42										20154	51268	50379	310419	149099	116433
2009-10-04	2013-10-04	2014-10-04	2015-10-04	2016-10-04		41	40	40	41	41		43										12320	31836	35754	228074	119390	90652
2009-10-05	2013-10-05	2014-10-05	2015-10-05	2016-10-05		41	40	41	41	41		44										22024	56993	58054	384952	193643	123673
2009-10-06	2013-10-06	2014-10-06	2015-10-06	2016-10-06		41	41	41	41	41		45										6651	16474	15797	100258	50121	32516
2009-10-07	2013-10-07	2014-10-07	2015-10-07	2016-10-07		41	41	41	41	41		46										10648	24366	23224	150534	75421	47305
2009-10-08	2013-10-08	2014-10-08	2015-10-08	2016-10-08		41	41	41	41	41		47										3531	6196	6396	49396	21657	15193
2009-10-09	2013-10-09	2014-10-09	2015-10-09	2016-10-09		41	41	41	41	42		48										9210	24706	25767	171167	91203	49984
2009-10-10	2013-10-10	2014-10-10	2015-10-10	2016-10-10		41	41	41	41	42		49										20632	45104	33179	207541	81824	46394
2009-10-11	2013-10-11	2014-10-11	2015-10-11	2016-10-11		42	41	41	42	42		50										8774	23881	22375	123734	56651	35048
2009-10-12	2013-10-12	2014-10-12	2015-10-12	2016-10-12		42	41	42	42	42		51										5039	6920	6611	65737	33546	15233
2009-10-13	2013-10-13	2014-10-13	2015-10-13	2016-10-13		42	42	42	42	42		52										577	787	745	6097	3069	1247
2009-10-14	2013-10-14	2014-10-14	2015-10-14	2016-10-14		42	42	42	42	42		1										847448	1829860	1653517	11032738	5142397	2993444
2009-10-15	2013-10-15	2014-10-15	2015-10-15	2016-10-15		42	42	42	42	42		2										847448	1829860	1653517	11032738	5142397	2993444
2009-10-16	2013-10-16	2014-10-16	2015-10-16	2016-10-16		42	42	42	42	43		3
2009-10-17	2013-10-17	2014-10-17	2015-10-17	2016-10-17		42	42	42	42	43		4										23499404
2009-10-18	2013-10-18	2014-10-18	2015-10-18	2016-10-18		43	42	42	43	43		5										23499404
2009-10-19	2013-10-19	2014-10-19	2015-10-19	2016-10-19		43	42	43	43	43		6
2009-10-20	2013-10-20	2014-10-20	2015-10-20	2016-10-20		43	43	43	43	43		7
2009-10-21	2013-10-21	2014-10-21	2015-10-21	2016-10-21		43	43	43	43	43		8										#3Millions	#6Millions
2009-10-22	2013-10-22	2014-10-22	2015-10-22	2016-10-22		43	43	43	43	43		9									Pedictric	847448	847448
2009-10-23	2013-10-23	2014-10-23	2015-10-23	2016-10-23		43	43	43	43	44		10										847448	847448
2009-10-24	2013-10-24	2014-10-24	2015-10-24	2016-10-24		43	43	43	43	44		11									Adult	4823304	11619218
2009-10-25	2013-10-25	2014-10-25	2015-10-25	2016-10-25		44	43	43	44	44		12										4823304	11619218
2009-10-26	2013-10-26	2014-10-26	2015-10-26	2016-10-26		44	43	44	44	44		13
2009-10-27	2013-10-27	2014-10-27	2015-10-27	2016-10-27		44	44	44	44	44		14
2009-10-28	2013-10-28	2014-10-28	2015-10-28	2016-10-28		44	44	44	44	44		15
2009-10-29	2013-10-29	2014-10-29	2015-10-29	2016-10-29		44	44	44	44	44		16
2009-10-30	2013-10-30	2014-10-30	2015-10-30	2016-10-30		44	44	44	44	45		17
2009-10-31	2013-10-31	2014-10-31	2015-10-31	2016-10-31		44	44	44	44	45		Pediatric	0.0208238	0.0272311	0.0393338	0.0708008	0.0208238	0.0272311	0.0393338	0.0708008
2009-11-01	2013-11-01	2014-11-01	2015-11-01	2016-11-01		45	44	44	45	45			0.0208238	0.0272311	0.0393338	0.0708008	0.0208238	0.0272311	0.0393338	0.0708008
2009-11-02	2013-11-02	2014-11-02	2015-11-02	2016-11-02		45	44	45	45	45		Adult	0.0329284	0.0430602	0.062198	0.111956	0.0288569	0.0377359	0.0545074	0.0981133
2009-11-03	2013-11-03	2014-11-03	2015-11-03	2016-11-03		45	45	45	45	45			0.0329284	0.0430602	0.062198	0.111956	0.0288569	0.0377359	0.0545074	0.0981133
2009-11-04	2013-11-04	2014-11-04	2015-11-04	2016-11-04		45	45	45	45	45		Total
2009-11-05	2013-11-05	2014-11-05	2015-11-05	2016-11-05		45	45	45	45	45		23499404
2009-11-06	2013-11-06	2014-11-06	2015-11-06	2016-11-06		45	45	45	45	46
2009-11-07	2013-11-07	2014-11-07	2015-11-07	2016-11-07		45	45	45	45	46
2009-11-08	2013-11-08	2014-11-08	2015-11-08	2016-11-08		46	45	45	46	46
2009-11-09	2013-11-09	2014-11-09	2015-11-09	2016-11-09		46	45	46	46	46
2009-11-10	2013-11-10	2014-11-10	2015-11-10	2016-11-10		46	46	46	46	46
2009-11-11	2013-11-11	2014-11-11	2015-11-11	2016-11-11		46	46	46	46	46
2009-11-12	2013-11-12	2014-11-12	2015-11-12	2016-11-12		46	46	46	46	46
2009-11-13	2013-11-13	2014-11-13	2015-11-13	2016-11-13		46	46	46	46	47
2009-11-14	2013-11-14	2014-11-14	2015-11-14	2016-11-14		46	46	46	46	47
2009-11-15	2013-11-15	2014-11-15	2015-11-15	2016-11-15		47	46	46	47	47
2009-11-16	2013-11-16	2014-11-16	2015-11-16	2016-11-16		47	46	47	47	47
2009-11-17	2013-11-17	2014-11-17	2015-11-17	2016-11-17		47	47	47	47	47
2009-11-18	2013-11-18	2014-11-18	2015-11-18	2016-11-18		47	47	47	47	47
2009-11-19	2013-11-19	2014-11-19	2015-11-19	2016-11-19		47	47	47	47	47
2009-11-20	2013-11-20	2014-11-20	2015-11-20	2016-11-20		47	47	47	47	48
2009-11-21	2013-11-21	2014-11-21	2015-11-21	2016-11-21		47	47	47	47	48
2009-11-22	2013-11-22	2014-11-22	2015-11-22	2016-11-22		48	47	47	48	48
2009-11-23	2013-11-23	2014-11-23	2015-11-23	2016-11-23		48	47	48	48	48
2009-11-24	2013-11-24	2014-11-24	2015-11-24	2016-11-24		48	48	48	48	48
2009-11-25	2013-11-25	2014-11-25	2015-11-25	2016-11-25		48	48	48	48	48
2009-11-26	2013-11-26	2014-11-26	2015-11-26	2016-11-26		48	48	48	48	48
2009-11-27	2013-11-27	2014-11-27	2015-11-27	2016-11-27		48	48	48	48	49
2009-11-28	2013-11-28	2014-11-28	2015-11-28	2016-11-28		48	48	48	48	49
2009-11-29	2013-11-29	2014-11-29	2015-11-29	2016-11-29		49	48	48	49	49
2009-11-30	2013-11-30	2014-11-30	2015-11-30	2016-11-30		49	48	49	49	49
2009-12-01	2013-12-01	2014-12-01	2015-12-01	2016-12-01		49	49	49	49	49
2009-12-02	2013-12-02	2014-12-02	2015-12-02	2016-12-02		49	49	49	49	49
2009-12-03	2013-12-03	2014-12-03	2015-12-03	2016-12-03		49	49	49	49	49
2009-12-04	2013-12-04	2014-12-04	2015-12-04	2016-12-04		49	49	49	49	50
2009-12-05	2013-12-05	2014-12-05	2015-12-05	2016-12-05		49	49	49	49	50
2009-12-06	2013-12-06	2014-12-06	2015-12-06	2016-12-06		50	49	49	50	50
2009-12-07	2013-12-07	2014-12-07	2015-12-07	2016-12-07		50	49	50	50	50
2009-12-08	2013-12-08	2014-12-08	2015-12-08	2016-12-08		50	50	50	50	50
2009-12-09	2013-12-09	2014-12-09	2015-12-09	2016-12-09		50	50	50	50	50
2009-12-10	2013-12-10	2014-12-10	2015-12-10	2016-12-10		50	50	50	50	50
2009-12-11	2013-12-11	2014-12-11	2015-12-11	2016-12-11		50	50	50	50	51
2009-12-12	2013-12-12	2014-12-12	2015-12-12	2016-12-12		50	50	50	50	51
2009-12-13	2013-12-13	2014-12-13	2015-12-13	2016-12-13		51	50	50	51	51
2009-12-14	2013-12-14	2014-12-14	2015-12-14	2016-12-14		51	50	51	51	51
2009-12-15	2013-12-15	2014-12-15	2015-12-15	2016-12-15		51	51	51	51	51
2009-12-16	2013-12-16	2014-12-16	2015-12-16	2016-12-16		51	51	51	51	51
2009-12-17	2013-12-17	2014-12-17	2015-12-17	2016-12-17		51	51	51	51	51
2009-12-18	2013-12-18	2014-12-18	2015-12-18	2016-12-18		51	51	51	51	52
2009-12-19	2013-12-19	2014-12-19	2015-12-19	2016-12-19		51	51	51	51	52
2009-12-20	2013-12-20	2014-12-20	2015-12-20	2016-12-20		52	51	51	52	52
2009-12-21	2013-12-21	2014-12-21	2015-12-21	2016-12-21		52	51	52	52	52
2009-12-22	2013-12-22	2014-12-22	2015-12-22	2016-12-22		52	52	52	52	52
2009-12-23	2013-12-23	2014-12-23	2015-12-23	2016-12-23		52	52	52	52	52
2009-12-24	2013-12-24	2014-12-24	2015-12-24	2016-12-24		52	52	52	52	52
2009-12-25	2013-12-25	2014-12-25	2015-12-25	2016-12-25		52	52	52	52	53
2009-12-26	2013-12-26	2014-12-26	2015-12-26	2016-12-26		52	52	52	52	53
2009-12-27	2013-12-27	2014-12-27	2015-12-27	2016-12-27		53	52	52	53	53
2009-12-28	2013-12-28	2014-12-28	2015-12-28	2016-12-28		53	52	53	53	53
2009-12-29	2013-12-29	2014-12-29	2015-12-29	2016-12-29		53	53	53	53	53
2009-12-30	2013-12-30	2014-12-30	2015-12-30	2016-12-30		53	53	53	53	53
2009-12-31	2013-12-31	2014-12-31	2015-12-31	2016-12-31		53	53	53	53	53
2010-01-01	2014-01-01	2015-01-01	2016-01-01	2017-01-01		1	1	1	1	1
2010-01-02	2014-01-02	2015-01-02	2016-01-02	2017-01-02		1	1	1	1	1
2010-01-03	2014-01-03	2015-01-03	2016-01-03	2017-01-03		2	1	1	2	1
2010-01-04	2014-01-04	2015-01-04	2016-01-04	2017-01-04		2	1	2	2	1
2010-01-05	2014-01-05	2015-01-05	2016-01-05	2017-01-05		2	2	2	2	1
2010-01-06	2014-01-06	2015-01-06	2016-01-06	2017-01-06		2	2	2	2	1
2010-01-07	2014-01-07	2015-01-07	2016-01-07	2017-01-07		2	2	2	2	1
2010-01-08	2014-01-08	2015-01-08	2016-01-08	2017-01-08		2	2	2	2	2
2010-01-09	2014-01-09	2015-01-09	2016-01-09	2017-01-09		2	2	2	2	2
2010-01-10	2014-01-10	2015-01-10	2016-01-10	2017-01-10		3	2	2	3	2
2010-01-11	2014-01-11	2015-01-11	2016-01-11	2017-01-11		3	2	3	3	2
2010-01-12	2014-01-12	2015-01-12	2016-01-12	2017-01-12		3	3	3	3	2
2010-01-13	2014-01-13	2015-01-13	2016-01-13	2017-01-13		3	3	3	3	2
2010-01-14	2014-01-14	2015-01-14	2016-01-14	2017-01-14		3	3	3	3	2
2010-01-15	2014-01-15	2015-01-15	2016-01-15	2017-01-15		3	3	3	3	3
2010-01-16	2014-01-16	2015-01-16	2016-01-16	2017-01-16		3	3	3	3	3
2010-01-17	2014-01-17	2015-01-17	2016-01-17	2017-01-17		4	3	3	4	3
2010-01-18	2014-01-18	2015-01-18	2016-01-18	2017-01-18		4	3	4	4	3
2010-01-19	2014-01-19	2015-01-19	2016-01-19	2017-01-19		4	4	4	4	3
2010-01-20	2014-01-20	2015-01-20	2016-01-20	2017-01-20		4	4	4	4	3
2010-01-21	2014-01-21	2015-01-21	2016-01-21	2017-01-21		4	4	4	4	3
2010-01-22	2014-01-22	2015-01-22	2016-01-22	2017-01-22		4	4	4	4	4
2010-01-23	2014-01-23	2015-01-23	2016-01-23	2017-01-23		4	4	4	4	4
2010-01-24	2014-01-24	2015-01-24	2016-01-24	2017-01-24		5	4	4	5	4
2010-01-25	2014-01-25	2015-01-25	2016-01-25	2017-01-25		5	4	5	5	4
2010-01-26	2014-01-26	2015-01-26	2016-01-26	2017-01-26		5	5	5	5	4
2010-01-27	2014-01-27	2015-01-27	2016-01-27	2017-01-27		5	5	5	5	4
2010-01-28	2014-01-28	2015-01-28	2016-01-28	2017-01-28		5	5	5	5	4
2010-01-29	2014-01-29	2015-01-29	2016-01-29	2017-01-29		5	5	5	5	5
2010-01-30	2014-01-30	2015-01-30	2016-01-30	2017-01-30		5	5	5	5	5
2010-01-31	2014-01-31	2015-01-31	2016-01-31	2017-01-31		6	5	5	6	5
2010-02-01	2014-02-01	2015-02-01	2016-02-01	2017-02-01		6	5	6	6	5
2010-02-02	2014-02-02	2015-02-02	2016-02-02	2017-02-02		6	6	6	6	5
2010-02-03	2014-02-03	2015-02-03	2016-02-03	2017-02-03		6	6	6	6	5
2010-02-04	2014-02-04	2015-02-04	2016-02-04	2017-02-04		6	6	6	6	5
2010-02-05	2014-02-05	2015-02-05	2016-02-05	2017-02-05		6	6	6	6	6
2010-02-06	2014-02-06	2015-02-06	2016-02-06	2017-02-06		6	6	6	6	6
2010-02-07	2014-02-07	2015-02-07	2016-02-07	2017-02-07		7	6	6	7	6
2010-02-08	2014-02-08	2015-02-08	2016-02-08	2017-02-08		7	6	7	7	6
2010-02-09	2014-02-09	2015-02-09	2016-02-09	2017-02-09		7	7	7	7	6
2010-02-10	2014-02-10	2015-02-10	2016-02-10	2017-02-10		7	7	7	7	6
2010-02-11	2014-02-11	2015-02-11	2016-02-11	2017-02-11		7	7	7	7	6
2010-02-12	2014-02-12	2015-02-12	2016-02-12	2017-02-12		7	7	7	7	7
2010-02-13	2014-02-13	2015-02-13	2016-02-13	2017-02-13		7	7	7	7	7
2010-02-14	2014-02-14	2015-02-14	2016-02-14	2017-02-14		8	7	7	8	7
2010-02-15	2014-02-15	2015-02-15	2016-02-15	2017-02-15		8	7	8	8	7
2010-02-16	2014-02-16	2015-02-16	2016-02-16	2017-02-16		8	8	8	8	7
2010-02-17	2014-02-17	2015-02-17	2016-02-17	2017-02-17		8	8	8	8	7
2010-02-18	2014-02-18	2015-02-18	2016-02-18	2017-02-18		8	8	8	8	7
2010-02-19	2014-02-19	2015-02-19	2016-02-19	2017-02-19		8	8	8	8	8
2010-02-20	2014-02-20	2015-02-20	2016-02-20	2017-02-20		8	8	8	8	8
2010-02-21	2014-02-21	2015-02-21	2016-02-21	2017-02-21		9	8	8	9	8
2010-02-22	2014-02-22	2015-02-22	2016-02-22	2017-02-22		9	8	9	9	8
2010-02-23	2014-02-23	2015-02-23	2016-02-23	2017-02-23		9	9	9	9	8
2010-02-24	2014-02-24	2015-02-24	2016-02-24	2017-02-24		9	9	9	9	8
2010-02-25	2014-02-25	2015-02-25	2016-02-25	2017-02-25		9	9	9	9	8
2010-02-26	2014-02-26	2015-02-26	2016-02-26	2017-02-26		9	9	9	9	9
2010-02-27	2014-02-27	2015-02-27	2016-02-27	2017-02-27		9	9	9	9	9
2010-02-28	2014-02-28	2015-02-28	2016-02-28	2017-02-28		10	9	9	10	9
2010-03-01	2014-03-01	2015-03-01	2016-02-29	2017-03-01		10	9	10	10	9

## Sheet: TransmissionRate
Week	t	R=1 No Vaccinatoin		R=1 Eff Vaccination=1770000		R=1 Eff Vaccination=3540000		2016 R=1 Eff Vaccination=1770000			2009 R=1 Eff Vaccination=2070000			2009 R=1 Eff Vaccination=1770000
23	0	0	0,	0	0,	0	0,	0	0,		0	0,		0	0,
24	1	0.953006	0.953006212006204,	0.953012	0.953012093061768,	0.953003	0.95300313751617,	0.953012	0.953011775388624,		0.912408	0.912407952988203,		0.912406	0.912405864594496,
25	2	0.97928	0.979280197454425,	0.979277	0.979277154275235,	0.979284	0.979283772978679,	0.979277	0.979276648024616,		0.99853	0.998530446966964,		0.998504	0.99850376246366,
26	3	0.945782	0.945782373051842,	0.945783	0.945783189288467,	0.945769	0.945769172416498,	0.945784	0.945783523002419,		0.984348	0.984347859337074,		0.984384	0.98438445059552,
27	4	0.958751	0.958751494063751,	0.958749	0.958748944310932,	0.958769	0.958768839309547,	0.958748	0.958748486909395,		1.04221	1.04220927765083,		1.0422	1.04219701227723,
28	5	0.972284	0.972283839280023,	0.972288	0.972288393464505,	0.972292	0.97229244646942,	0.972288	0.972287577473297,		1.00113	1.00113096425647,		1.00113	1.00113288261386,
29	6	1.00806	1.00806358451746,	1.00806	1.0080557500019,	1.00807	1.00806951657884,	1.00806	1.0080551710652,		1.01954	1.01954381768775,		1.01954	1.01954153546307,
30	7	0.95399	0.953990301525824,	0.953997	0.953997067840068,	0.953971	0.953970715491018,	0.953996	0.953996122546339,		1.06147	1.06147068461962,		1.06147	1.06147476782892,
31	8	0.984337	0.984336885504875,	0.984335	0.984335452175314,	0.984335	0.984335030724248,	0.984336	0.984335519887046,		1.09	1.09000266262647,		1.08999	1.08999448660244,
32	9	1.04603	1.04602657942136,	1.04603	1.04602737693841,	1.04602	1.04602477205204,	1.04603	1.0460283166091,		0.957772	0.957771875471301,		0.957775	0.957774865770352,
33	10	1.02896	1.02895681084533,	1.02895	1.02895351457638,	1.02896	1.02896103122529,	1.02895	1.02895487234308,		1.14771	1.14770967665914,		1.14771	1.14771480929792,
34	11	1.00412	1.0041189357438,	1.00412	1.00412214248117,	1.00412	1.00412356926968,	1.00412	1.00412286689019,		1.12938	1.12938108090225,		1.12941	1.12940576777765,
35	12	0.998271	0.998270978844301,	0.998276	0.9982760755104,	0.998274	0.998274485271871,	0.998277	0.998276588695015,		1.33425	1.33424755153448,		1.33423	1.33423376119953,
36	13	1.17168	1.1716788156652,	1.17166	1.17166378203324,	1.17166	1.17166341805862,	1.17166	1.17166436918344,		1.21257	1.21257224406016,		1.21256	1.21255839225331,
37	14	1.02188	1.02187553056122,	1.02188	1.02187900822263,	1.02188	1.02188240897487,	1.02188	1.0218790608568,		1.10223	1.10223477255448,		1.10223	1.10223291503856,
38	15	1.04158	1.04158470656408,	1.04159	1.04158548246089,	1.04159	1.0415858065776,	1.04159	1.04158538980612,		0.934205	0.934204928285287,		0.934209	0.934209027765199,
39	16	1.01666	1.01666421317057,	1.01666	1.01666356791373,	1.01666	1.01665923474608,	1.01666	1.01666336821509,		0.977367	0.977366609336615,		0.977366	0.977366393532522,
40	17	1.06702	1.0670196271591,	1.06702	1.06702068711789,	1.06702	1.06701986460703,	1.06702	1.06702039616278,		0.944036	0.944036306353213,		0.944037	0.944037266290342,
41	18	1.06864	1.06864273314493,	1.07509	1.07509424261969,	1.08163	1.08162869539789,	1.07509	1.0750932874501,		1.20027	1.20027031964108,		1.19902	1.19902403149942,
42	19	1.06456	1.06455728868626,	1.0775	1.07750461580911,	1.09079	1.09079051470047,	1.0775	1.07750417555784,		1.15119	1.15119245664461,		1.14879	1.14878909512895,
43	20	1.04164	1.0416365372836,	1.06081	1.0608063739063,	1.08067	1.08066845816561,	1.06081	1.06080545968792,		1.237	1.23699878024378,		1.23313	1.23312553327362,
44	21	1.06316	1.06316485031474,	1.08947	1.08947122093383,	1.11711	1.11711439906121,	1.08947	1.08947091584999,		1.20125	1.20124795083981,		1.19616	1.19616205876114,
45	22	1.02396	1.02395656453376,	1.05589	1.055889241567,	1.08988	1.08987694168256,	1.05589	1.05588950961458,		1.10954	1.10953809263599,		1.10361	1.10360786678408,
46	23	1.00451	1.00450745612596,	1.04241	1.04240877485413,	1.08328	1.08328368861995,	1.04241	1.04240948074805,		1.13468	1.13468095878339,		1.12732	1.12732103597105,
47	24	1.15476	1.15476341954902,	1.20607	1.20606748709911,	1.26214	1.26213927623616,	1.20607	1.20606772972349,		1.23649	1.23649366497334,		1.22703	1.22702932135237,
48	25	1.05394	1.05393712652644,	1.1079	1.10789814945377,	1.1677	1.16769603943338,	1.1079	1.10789871790324,		1.3168	1.3167970422913,		1.30518	1.30518469859486,
49	26	1.11112	1.11111951352967,	1.17569	1.17569455037015,	1.24824	1.24823945914364,	1.17569	1.17569476355413,		0.964759	0.964758624967193,		0.955011	0.955011026879217,
50	27	1.09454	1.09454196750846,	1.16586	1.16586297270071,	1.24714	1.24713746831909,	1.16586	1.1658624371891,		0.954812	0.954812171879377,		0.943987	0.943986565765418,
51	28	1.00788	1.00788070671645,	1.08081	1.08080882081457,	1.16509	1.16508839214683,	1.08081	1.08080753289015,		0.896674	0.89667350452623,		0.885374	0.885373855928667,
52	29	1.21053	1.21052804860503,	1.30695	1.30694859494407,	1.42007	1.42006875410914,	1.30695	1.30694828492551,		1.15722	1.15721973901937,		1.14113	1.14113308665227,
1	30	1.14446	1.14446004771321,	1.24418	1.24417752235169,	1.36294	1.36293953264794,	1.24418	1.24417752444103,		1.13143	1.13142533035804,		1.11423	1.11422751595444,
2	31	1.13887	1.13887478686163,	1.23842	1.23842006803325,	1.35704	1.35704214412697,	1.23842	1.23841984493109,		1.20611	1.20611188625507,		1.18769	1.18769373602479,
3	32	1.16262	1.16261793133477,	1.26461	1.26461257780032,	1.3862	1.38619587857153,	1.26461	1.2646115501849,		1.24011	1.24011028556435,		1.22114	1.22114104777654,
4	33	1.21846	1.21845667533618,	1.32573	1.32573304006041,	1.45375	1.45374619769488,	1.32573	1.32573277320067,		1.10052	1.10051927757394,		1.08363	1.08363232104937,
5	34	1.13301	1.13300750114235,	1.23321	1.23321138634365,	1.35285	1.35285206647743,	1.23321	1.23321051823682,		1.14843	1.14843407839204,		1.13074	1.1307397518775,
6	35	0.905023	0.905022892473631,	0.985412	0.985412338155992,	1.08147	1.08147292418703,	0.985412	0.985411798756795,		1.27259	1.27258934981254,		1.25298	1.25297576275098,
7	36	1.29128	1.29128232553401,	1.40645	1.40644664780045,	1.54412	1.54412235702423,	1.40645	1.40644602654105,		0.584435	0.584434854288633,		0.57559	0.575590192554648,
8	37	1.2715	1.27149941411423,	1.38539	1.38538756411173,	1.52172	1.52172050242995,	1.38539	1.38538767519955,		2.46189	2.46188710044013,		2.42277	2.42276842809155,
9	38	1.0884	1.08839862924146,	1.18642	1.18641993907341,	1.30384	1.30384144843436,	1.18642	1.18642034288595,		1.15587	1.15586804996169,		1.1379	1.13789929512632,
10	39	1.03199	1.03198569020856,	1.12542	1.1254185666473,	1.23746	1.23746173372725,	1.12542	1.12541988152658,		1.38909	1.38909259718585,		1.36743	1.36742860337428,
11	40	1.05955	1.05955088600715,	1.15596	1.15595601780725,	1.27167	1.27167124643477,	1.15596	1.15595739335741,		1.30662	1.30661880248474,		1.2862	1.28619968783274,
12	41	1.06057	1.06056915546272,	1.15753	1.15753205834422,	1.27403	1.27402611242218,	1.15753	1.15753233370719,		1.35166	1.35165804190003,		1.33046	1.33046151686551,
13	42	1.11621	1.11621354497169,	1.21875	1.21875332067408,	1.342	1.34200440455137,	1.21875	1.21875264968292,		1.29949	1.29949221437643,		1.27904	1.27904335660832,
14	43	0.970413	0.970413414330735,	1.05996	1.05996218992868,	1.16772	1.16771613451103,	1.05996	1.05996148612535,		1.12127	1.12127141056898,		1.10357	1.10357056071192,
15	44	1.03906	1.03906009609911,	1.13533	1.13532992300139,	1.25126	1.25125601254878,	1.13533	1.13532947443051,		1.23581	1.23580652822172,		1.21624	1.21624475885874,
16	45	1.10467	1.10467384135658,	1.2074	1.20740365419453,	1.33121	1.33121455373875,	1.2074	1.20740401514487,		1.24809	1.24809420755527,		1.22827	1.2282650522731,
17	46	1.05858	1.05858006918281,	1.15739	1.15738554663824,	1.27652	1.27652479126583,	1.15739	1.15738585820287,		1.32967	1.32966568692057,		1.3085	1.30849859736625,
18	47	1.01432	1.01431839096421,	1.1093	1.10930283788203,	1.22397	1.22396783914468,	1.1093	1.10930391594533,		1.27916	1.27915721062103,		1.25871	1.25870853578766,
19	48	1.08896	1.08896280249558,	1.19127	1.19127369891622,	1.31476	1.31476209109283,	1.19127	1.19127406661825,		1.30476	1.3047576186535,		1.28384	1.28383650074725,
20	49	1.08993	1.08992569690175,	1.19262	1.19262259854226,	1.31667	1.31667422399545,	1.19262	1.19262235555918,		1.17332	1.17331810771302,		1.15445	1.15444594916915,
21	50	1.1038	1.10380137652162,	1.20802	1.20801753043659,	1.33416	1.33416314958411,	1.20802	1.20801694591141,		1.23734	1.23734466589463,		1.21741	1.2174059571358,
22	51	1.16247	1.16247490357783,	1.27274	1.27274383225428,	1.4058	1.40580068175031,	1.27274	1.27274275472497,		1.24614	1.24614455843632,		1.226	1.22600110554882,
23	52	1.21861	1.21860826812946,	1.33396	1.3339621894588,	1.47404	1.47404430803361,	1.33396	1.333961660282,		0.962512	0.962511924357654,		0.946934	0.946933677222515,
	Error	20.3057		14.9804				Error	13.7252		Error	32.6486

## Sheet: Beta
	2013-16
	t	1	2	3	4	5	6	7	8	9	10	11	12	13
	Beta(t)	0.953012	0.979277	0.945784	0.958748	0.972288	1.00806	0.953996	0.984336	1.04603	1.02895	1.00412	0.998277	1.17166
	t	14	15	16	17	18	19	20	21	22	23	24	25	26
	Beta(t)	1.02188	1.04159	1.01666	1.06702	1.07509	1.0775	1.06081	1.08947	1.05589	1.04241	1.20607	1.1079	1.17569
	t	27	28	29	30	31	32	33	34	35	36	37	38	39
	Beta(t)	1.16586	1.08081	1.30695	1.24418	1.23842	1.26461	1.32573	1.23321	0.985412	1.40645	1.38539	1.18642	1.12542
	t	40	41	42	43	44	45	46	47	48	49	50	51	52
	Beta(t)	1.15596	1.15753	1.21875	1.05996	1.13533	1.2074	1.15739	1.1093	1.19127	1.19262	1.20802	1.27274	1.33396
	2009 70%
	t	1	2	3	4	5	6	7	8	9	10	11	12	13
	Beta(t)	0.912337	0.998579	0.984375	1.04221	1.00111	1.01957	1.06147	1.08998	0.957792	1.14771	1.12938	1.33425	1.21257
	t	14	15	16	17	18	19	20	21	22	23	24	25	26
	Beta(t)	1.10224	0.93421	0.977365	0.944033	1.20039	1.15141	1.2374	1.20175	1.11013	1.13542	1.23745	1.31797	0.965737
	t	27	28	29	30	31	32	33	34	35	36	37	38	39
	Beta(t)	0.955906	0.897821	1.15884	1.13319	1.20797	1.24205	1.10225	1.15023	1.27456	0.585734	2.46423	1.1577	1.39128
	t	40	41	42	43	44	45	46	47	48	49	50	51	52
	Beta(t)	1.3087	1.35382	1.30157	1.12307	1.2378	1.25013	1.33181	1.28123	1.3069	1.17523	1.23939	1.24819	0.964096
	2009 59%
	t	1	2	3	4	5	6	7	8	9	10	11	12	13
	Beta(t)	0.912406	0.998504	0.984384	1.0422	1.00113	1.01954	1.06147	1.08999	0.957775	1.14771	1.12941	1.33423	1.21256
	t	14	15	16	17	18	19	20	21	22	23	24	25	26
	Beta(t)	1.10223	0.934209	0.977366	0.944037	1.19902	1.14879	1.23313	1.19616	1.10361	1.12732	1.22703	1.30518	0.955011
	t	27	28	29	30	31	32	33	34	35	36	37	38	39
	Beta(t)	0.943987	0.885374	1.14113	1.11423	1.18769	1.22114	1.08363	1.13074	1.25298	0.57559	2.42277	1.1379	1.36743
	t	40	41	42	43	44	45	46	47	48	49	50	51	52
	Beta(t)	1.2862	1.33046	1.27904	1.10357	1.21624	1.22827	1.3085	1.25871	1.28384	1.15445	1.21741	1.226	0.946934

## Sheet: for_paper_fig6&7
2013-2015 ILIs	3098632
Initial (wk23) infections	54301.7
	PolicyA-1									PolicyA-2									PolicyA-3									PolicyA-4									PolicyB-1									PolicyB-2
	Sim#1	Sim#2	Sim#3	Sim#4	Sim#5					Sim#1	Sim#2	Sim#3	Sim#4	Sim#5					Sim#1	Sim#2	Sim#3	Sim#4	Sim#5					Sim#1	Sim#2	Sim#3	Sim#4	Sim#5					Sim#1	Sim#2	Sim#3	Sim#4	Sim#5					Sim#1	Sim#2	Sim#3	Sim#4
2013~16, e=0.59
Infections	3411490	3440000	3412837	3450416	3454977					3153548	3111573	3133442	3121735	3149668					2914919	2901669	2900903	2924877	2948543					2750830	2710204	2687071	2676537	2632398					2084001	2123323	2113453	2115192	2110574					1849461	1858263	1842805	1876368
Cases averted	-367160	-395670	-368507	-406086	-410647					-109218	-67242.7	-89111.7	-77404.7	-105338					129411	142661	143427	119453	95787.3					293500	334126	357259	367793	411932					960329	921007	930877	929138	933756					1.19487e+06	1.18607e+06	1.20153e+06	1.16796e+06
2013~16, e=0.5
Infections	3686943	3723071	3668550	3707837	3714440					3454489	3464238	3429963	3443301	3458861					3282768	3243710	3251181	3209087	3235995					3023645	3081480	3018383	3064152	3002536					2388864	2427885	2327837	2410334	2386462					2096351	2088747	2112451	2133324
Cases averted	-642613	-678741	-624220	-663507	-670110					-410159	-419908	-385633	-398971	-414531					-238438	-199380	-206851	-164757	-191665					20685.3	-37149.7	25947.3	-19821.7	41794.3					655466	616445	716493	633996	657868					947979	955583	931879	911006
(Infecteions)	VE 59%			VE 50%
	Mean	S.D.	mean / s.d.	Mean	S.D.	mean / s.d.
Policy A-1	3.48825e+06	20616	169.201	3.75447e+06	22145.3	169.538		0.0763204
Policy A-2	3.18829e+06	17897.8	178.139	3.50447e+06	13671.2	256.341		0.0991681
Policy A-3	2.97248e+06	19675.5	151.075	3.29885e+06	26627.5	123.889		0.109796
Policy A-4	2.74571e+06	43607.3	62.9644	3.09234e+06	33252.9	92.9947		0.126245
Policy B-1	2.16361e+06	14918.7	145.027	2.44258e+06	37788.7	64.6378		0.128936
Policy B-2	1.91231e+06	12919.9	148.013	2.15929e+06	18141.8	119.023		0.129152
Policy B-3	1.68533e+06	31473.6	53.5473	1.91982e+06	12845.3	149.457		0.139136
Policy B-4	1.4661e+06	19774.1	74.1423	1.71465e+06	24459.6	70.1013		0.169531
(Cases averted)	VE 59%		VE 50%
	Mean	S.D.	Mean	S.D.
Policy A-1	-389614	20616	-655838	22145.3
Policy A-2	-89662.9	17897.8	-405840	13671.2
Policy A-3	126148	19675.5	-200218	26627.5
Policy A-4	352922	43607.3	6291.13	33252.9
Policy B-1	935022	14918.7	656054	37788.7
Policy B-2	1.18632e+06	12919.9	939345	18141.8
Policy B-3	1.4133e+06	31473.6	1.17881e+06	12845.3
Policy B-4	1.63253e+06	19774.1	1.38399e+06	24459.6
(Cases averted)
VE 59%					VE 50%
	O	H	L	C		O	H	L	C
	-389614	-368998	-410230	0		-655838	-633693	-677983	0
	-89662.9	-71765.1	-107561	0		-405840	-392169	-419511	0
	126148	145824	106473	0		-200218	-173590	-226845	0
	352922	396530	309315	0		6291.13	39544	-26961.8	0
	935022	949940	920103	0		656054	693843	618265	0
	1.18632e+06	1.19924e+06	1.1734e+06	0		939345	957486	921203	0
	1.4133e+06	1.44478e+06	1.38183e+06	0		1.17881e+06	1.19166e+06	1.16597e+06	0
	1.63253e+06	1.65231e+06	1.61276e+06	0		1.38399e+06	1.40845e+06	1.35953e+06	0
(Infecteions)
VE 59%					VE 50%
	Mean	Mean-3*S.D.	Mean+3*S.D			Mean	Mean-3*S.D.	Mean+3*S.D
	3.48825e+06	3.4264e+06	123696			3.75447e+06	3.68803e+06	132872
	3.18829e+06	3.1346e+06	107387			3.50447e+06	3.46346e+06	82026.9
	2.97248e+06	2.91346e+06	118053			3.29885e+06	3.21897e+06	159765
	2.74571e+06	2.61489e+06	261644			3.09234e+06	2.99258e+06	199517
	2.16361e+06	2.11885e+06	89512.2			2.44258e+06	2.32921e+06	226732
	1.91231e+06	1.87355e+06	77519.4			2.15929e+06	2.10486e+06	108851
	1.68533e+06	1.59091e+06	188842			1.91982e+06	1.88128e+06	77071.5
	1.4661e+06	1.40677e+06	118645			1.71465e+06	1.64127e+06	146757
[truncated: 11 more columns]
